# Supplementary material for: Puerarin: A Potential Therapeutic for SARS-CoV-2 and Hantavirus Co-Infection
Source: Front Immunol. 2022 May 19;13:892350. doi: 10.3389/fimmu.2022.892350 (PMC9161725; doi:10.3389/fimmu.2022.892350)
Supplement: Supplementary Table 1 — Related targets of puerarin. [file Table_1.xlsx]

## Sheet: batman
1131	CHRM3	15.365
1128	CHRM1	15.365
57053	CHRNA10	15.365
1129	CHRM2	15.365
1135	CHRNA2	8.253
6531	SLC6A3	5.785
788	SLC25A20	5.785
55244	SLC47A1	5.785
1576	CYP3A4	5.785
8911	CACNA1I	5.785
2903	GRIN2A	5.785
1595	CYP51A1	5.785
4353	MPO	5.785
123096	SLC25A29	5.785
4986	OPRK1	5.785
6583	SLC22A4	5.785
1376	CPT2	5.785
1133	CHRM5	5.785
6532	SLC6A4	5.785
4988	OPRM1	5.785
3757	KCNH2	5.785
2905	GRIN2C	5.785
2904	GRIN2B	5.785
1066	CES1	5.785
1374	CPT1A	5.785
3359	HTR3A	5.785
2862	MLNR	5.785
28234	SLCO1B3	5.785
7498	XDH	5.785
2906	GRIN2D	5.785
54677	CROT	5.785
6584	SLC22A5	5.785
213	ALB	5.785
1384	CRAT	5.785
1132	CHRM4	5.785
5243	ABCB1	5.785
6530	SLC6A2	5.785
2902	GRIN1	5.785
10599	SLCO1B1	5.785
11280	SCN11A	2.608
781	CACNA2D1	2.608
3779	KCNMB1	2.608
3780	KCNN1	2.608
51686	OAZ3	2.608
18	ABAT	2.608
113451	AZIN2	2.608
6542	SLC7A2	2.608
9900	SV2A	2.608
23620	NTSR2	2.608
10536	P3H3	2.608
55699	IARS2	2.608
435	ASL	2.608
586	BCAT1	2.608
773	CACNA1A	2.608
51702	PADI3	2.608
7407	VARS	2.608
4985	OPRD1	2.608
9360	PPIG	2.608
10166	SLC25A15	2.608
3781	KCNN2	2.608
6897	TARS	2.608
51305	KCNK9	2.608
4791	NFKB2	2.608
116444	GRIN3B	2.608
9254	CACNA2D2	2.608
51451	LCMT1	2.608
7124	TNF	2.608
79896	THNSL1	2.608
6331	SCN5A	2.608
1608	DGKG	2.608
5468	PPARG	2.608
6336	SCN10A	2.608
11240	PADI2	2.608
4129	MAOB	2.608
4318	MMP9	2.608
5480	PPIC	2.608
4843	NOS2	2.608
9791	PTDSS1	2.608
367	AR	2.608
2908	NR3C1	2.608
2628	GATM	2.608
1136	CHRNA3	2.608
774	CACNA1B	2.608
5831	PYCR1	2.608
3458	IFNG	2.608
4128	MAOA	2.608
5578	PRKCA	2.608
5625	PRODH	2.608
51520	LARS	2.608
25973	PARS2	2.608
383	ARG1	2.608
3269	HRH1	2.608
23576	DDAH1	2.608
4942	OAT	2.608
3777	KCNK3	2.608
1636	ACE	2.608
5478	PPIA	2.608
4947	OAZ2	2.608
83884	SLC25A2	2.608
81490	PTDSS2	2.608
1719	DHFR	2.608
2194	FASN	2.608
11254	SLC6A14	2.608
10105	PPIF	2.608
5406	PNLIP	2.608
84889	SLC7A3	2.608
10396	ATP8A1	2.608
2058	EPRS	2.608
3783	KCNN4	2.608
4946	OAZ1	2.608
80222	TARS2	2.608
1373	CPS1	2.608
23395	LARS2	2.608
2209	FCGR1A	2.608
116443	GRIN3A	2.608
5033	P4HA1	2.608
6476	SI	2.608
445	ASS1	2.608
55512	SMPD3	2.608
10465	PPIH	2.608
29920	PYCR2	2.608
10242	KCNMB2	2.608
112849	L3HYPDH	2.608
11212	PROSC	2.608
6541	SLC7A1	2.608
8913	CACNA1G	2.608
27345	KCNMB4	2.608
23564	DDAH2	2.608
36	ACADSB	2.608
6545	SLC7A4	2.608
23569	PADI4	2.608
65263	PYCRL	2.608
1181	CLCN2	2.608
5096	PCCB	2.608
4846	NOS3	2.608
5009	OTC	2.608
23761	PISD	2.608
55214	P3H2	2.608
3778	KCNMA1	2.608
384	ARG2	2.608
134	ADORA1	2.608
4036	LRP2	2.608
2550	GABBR1	2.608
4842	NOS1	2.608
3376	IARS	2.608
6534	SLC6A7	2.608
1143	CHRNB4	2.608
8974	P4HA2	2.608
353238	PADI6	2.608
6833	ABCC8	2.608
8513	LIPF	2.608
587	BCAT2	2.608
29943	PADI1	2.608
949	SCARB1	2.608
3782	KCNN3	2.608
27094	KCNMB3	2.608
55627	SMPD4	2.608
9836	LCMT2	2.608
64175	P3H1	2.608
8527	DGKD	2.608
5479	PPIB	2.608
	-2.394
57573	ZNF471	2.394
8563	THOC5	2.394
8434	RECK	2.394
10309	CCNO	2.394
7652	ZNF99	2.394
80176	SPSB1	2.394
386678	KRTAP10-11	2.394
1387	CREBBP	2.394
55854	ZC3H15	2.394
150275	CCDC117	2.394
79572	ATP13A3	2.394
2634	GBP2	2.394
1785	DNM2	2.394
8419	BFSP2	2.394
83548	COG3	2.394
9363	RAB33A	2.394
51599	LSR	2.394
152926	PPM1K	2.394
79618	HMBOX1	2.394
401409	RAB19	2.394
4893	NRAS	2.394
347517	RAB41	2.394
84071	ARMC2	2.394
7022	TFAP2C	2.394
1244	ABCC2	2.394
1638	DCT	2.394
25953	PNKD	2.394
374403	TBC1D10C	2.394
339263	C17orf51	2.394
1969	EPHA2	2.394
112812	FDX1L	2.394
85290	KRTAP4-3	2.394
2203	FBP1	2.394
4358	MPV17	2.394
91373	UAP1L1	2.394
337879	KRTAP8-1	2.394
114836	SLAMF6	2.394
101060321	LOC101060321	2.394
79805	VASH2	2.394
84275	SLC25A33	2.394
4836	NMT1	2.394
10233	LRRC23	2.394
23788	MTCH2	2.394
56971	CEACAM19	2.394
167465	ZNF366	2.394
388667	C1orf137	2.394
100996485	C5orf66	2.394
140465	MYL6B	2.394
84467	FBN3	2.394
90806	ANGEL2	2.394
374395	TMEM179B	2.394
282996	RBM20	2.394
57026	PDXP	2.394
57658	CALCOCO1	2.394
9968	MED12	2.394
26707	OR2J2	2.394
56666	PANX2	2.394
1259	CNGA1	2.394
9961	MVP	2.394
26002	MOXD1	2.394
8694	DGAT1	2.394
57379	AICDA	2.394
5464	PPA1	2.394
171392	ZNF675	2.394
9985	REC8	2.394
29998	GLTSCR1	2.394
3475	IFRD1	2.394
83547	RILP	2.394
55109	AGGF1	2.394
143241	DYDC1	2.394
8193	DPF1	2.394
6327	SCN2B	2.394
55814	BDP1	2.394
65059	RAPH1	2.394
117854	TRIM6	2.394
728689	EIF3CL	2.394
1203	CLN5	2.394
91664	ZNF845	2.394
343637	RSPO4	2.394
4261	CIITA	2.394
442868	BPY2C	2.394
51109	RDH11	2.394
55720	TSR1	2.394
10919	EHMT2	2.394
10390	CEPT1	2.394
200403	VWA3B	2.394
84649	DGAT2	2.394
283297	OR10A4	2.394
2359	FPR3	2.394
646960	PRSS56	2.394
116379	IL22RA2	2.394
29842	TFCP2L1	2.394
100141515	C17orf99	2.394
81309	OR4C15	2.394
9683	N4BP1	2.394
139135	PASD1	2.394
153527	ZMAT2	2.394
266629	SEC14L3	2.394
6631	SNRPC	2.394
8611	PPAP2A	2.394
51322	WAC	2.394
79154	DHRS11	2.394
286499	FAM133A	2.394
23171	GPD1L	2.394
4094	MAF	2.394
5970	RELA	2.394
4704	NDUFA9	2.394
1266	CNN3	2.394
6578	SLCO2A1	2.394
221491	C6orf1	2.394
79924	ADM2	2.394
3419	IDH3A	2.394
80032	ZNF556	2.394
245936	DEFB123	2.394
23416	KCNH3	2.394
79982	DNAJB14	2.394
10430	TMEM147	2.394
260425	MAGI3	2.394
10052	GJC1	2.394
39	ACAT2	2.394
7514	XPO1	2.394
51751	HIGD1B	2.394
10300	KATNB1	2.394
51025	PAM16	2.394
79823	CAMKMT	2.394
25854	FAM149A	2.394
348980	HCN1	2.394
8091	HMGA2	2.394
60436	TGIF2	2.394
2350	FOLR2	2.394
1	A1BG	2.394
506	ATP5B	2.394
51058	ZNF691	2.394
4184	SMCP	2.394
23318	ZCCHC11	2.394
729747	ZNF878	2.394
8100	IFT88	2.394
8600	TNFSF11	2.394
64777	RMND5B	2.394
122258	SPACA7	2.394
147700	KLC3	2.394
8537	BCAS1	2.394
23379	ICE1	2.394
8941	CDK5R2	2.394
57062	DDX24	2.394
255758	TCTEX1D2	2.394
113802	HENMT1	2.394
57380	MRS2	2.394
51667	NUB1	2.394
1973	EIF4A1	2.394
65122	PRAMEF2	2.394
8214	DGCR6	2.394
284992	CCDC150	2.394
57474	ZNF490	2.394
79611	ACSS3	2.394
152404	IGSF11	2.394
160728	SLC5A8	2.394
23659	PLA2G15	2.394
3849	KRT2	2.394
414899	BLID	2.394
9842	PLEKHM1	2.394
64782	AEN	2.394
8776	MTMR1	2.394
116154	PHACTR3	2.394
8711	TNK1	2.394
81559	TRIM11	2.394
2029	ENSA	2.394
57447	NDRG2	2.394
5671	PSG3	2.394
23584	VSIG2	2.394
201292	TRIM65	2.394
83443	SF3B5	2.394
4218	RAB8A	2.394
23225	NUP210	2.394
51138	COPS4	2.394
221294	NT5DC1	2.394
727800	RNF208	2.394
20	ABCA2	2.394
80760	ITIH5	2.394
23295	MGRN1	2.394
100996721	LOC100996721	2.394
255349	TMEM211	2.394
1983	EIF5	2.394
124842	TMEM132E	2.394
64786	TBC1D15	2.394
79085	SLC25A23	2.394
11152	WDR45	2.394
468	ATF4	2.394
7247	TSN	2.394
84618	NT5C1A	2.394
10327	AKR1A1	2.394
9697	TRAM2	2.394
7634	ZNF80	2.394
90313	TP53I13	2.394
729428	GAGE12B	2.394
554235	ASPDH	2.394
163175	LGI4	2.394
8754	ADAM9	2.394
126003	TRAPPC5	2.394
84816	RTN4IP1	2.394
143384	CACUL1	2.394
128372	OR6N1	2.394
10083	USH1C	2.394
84240	ZCCHC9	2.394
84287	ZDHHC16	2.394
5922	RASA2	2.394
200879	LIPH	2.394
10787	NCKAP1	2.394
285525	YIPF7	2.394
2583	B4GALNT1	2.394
9401	RECQL4	2.394
57332	CBX8	2.394
710	SERPING1	2.394
23277	CLUH	2.394
7087	ICAM5	2.394
5105	PCK1	2.394
112	ADCY6	2.394
154467	CCDC167	2.394
442444	FAM47C	2.394
338398	TAS2R60	2.394
9423	NTN1	2.394
92017	SNX29	2.394
26289	AK5	2.394
50814	NSDHL	2.394
9935	MAFB	2.394
492307	C8orf22	2.394
24139	EML2	2.394
157567	ANKRD46	2.394
6257	RXRB	2.394
643905	PRR21	2.394
2590	GALNT2	2.394
3750	KCND1	2.394
150590	C2orf15	2.394
79989	TTC26	2.394
10161	LPAR6	2.394
159989	CCDC67	2.394
9255	AIMP1	2.394
5337	PLD1	2.394
286133	SCARA5	2.394
146059	CDAN1	2.394
9133	CCNB2	2.394
7123	CLEC3B	2.394
168537	GIMAP7	2.394
55830	GLT8D1	2.394
5745	PTH1R	2.394
6513	SLC2A1	2.394
2116	ETV2	2.394
23247	KIAA0556	2.394
23632	CA14	2.394
55698	RADIL	2.394
9117	SEC22C	2.394
6218	RPS17	2.394
245806	VGLL2	2.394
25888	ZNF473	2.394
100287482	SMKR1	2.394
80820	EEPD1	2.394
254887	ZDHHC23	2.394
55973	BCAP29	2.394
389692	MAFA	2.394
114902	C1QTNF5	2.394
389320	TEX43	2.394
148534	TMEM56	2.394
55959	SULF2	2.394
6997	TDGF1	2.394
80199	FUZ	2.394
6744	SSFA2	2.394
207	AKT1	2.394
81550	TDRD3	2.394
54708	2022-03-05	2.394
48	ACO1	2.394
285848	PNPLA1	2.394
220047	CCDC83	2.394
56099	PCDHGB7	2.394
51031	GLOD4	2.394
89887	ZNF628	2.394
728229	TMEM191B	2.394
79192	IRX1	2.394
8607	RUVBL1	2.394
494513	DFNB59	2.394
286207	C9orf117	2.394
23385	NCSTN	2.394
9955	HS3ST3A1	2.394
84460	ZMAT1	2.394
57497	LRFN2	2.394
386653	IL31	2.394
9904	RBM19	2.394
79447	PAGR1	2.394
1155	TBCB	2.394
10844	TUBGCP2	2.394
93986	FOXP2	2.394
144402	CPNE8	2.394
11251	PTGDR2	2.394
25833	POU2F3	2.394
1617	DAZ1	2.394
490	ATP2B1	2.394
8634	RTCA	2.394
1843	DUSP1	2.394
56342	PPAN	2.394
55197	RPRD1A	2.394
84315	MON1A	2.394
51574	LARP7	2.394
56916	SMARCAD1	2.394
56140	PCDHA8	2.394
6502	SKP2	2.394
1294	COL7A1	2.394
119692	OR51S1	2.394
474343	SPIN2B	2.394
4640	MYO1A	2.394
7111	TMOD1	2.394
782	CACNB1	2.394
5225	PGC	2.394
83541	FAM110A	2.394
26045	LRRTM2	2.394
10544	PROCR	2.394
6510	SLC1A5	2.394
131450	CD200R1	2.394
10713	USP39	2.394
11272	PRR4	2.394
65065	NBEAL1	2.394
9867	PJA2	2.394
5327	PLAT	2.394
112770	GLMP	2.394
56924	PAK6	2.394
203286	ANKS6	2.394
8801	SUCLG2	2.394
1146	CHRNG	2.394
89	ACTN3	2.394
4342	MOS	2.394
10229	COQ7	2.394
10026	PIGK	2.394
63971	KIF13A	2.394
8661	EIF3A	2.394
3960	LGALS4	2.394
55287	TMEM40	2.394
146909	KIF18B	2.394
10550	ARL6IP5	2.394
7174	TPP2	2.394
1675	CFD	2.394
649	BMP1	2.394
3903	LAIR1	2.394
1318	SLC31A2	2.394
64393	ZMAT3	2.394
64216	TFB2M	2.394
645104	CLRN2	2.394
83882	TSPAN10	2.394
79078	C1orf50	2.394
402778	IFITM10	2.394
147920	IGFL2	2.394
125476	INO80C	2.394
3738	KCNA3	2.394
23432	GPR161	2.394
66008	TRAK2	2.394
343990	KIAA1211L	2.394
2673	GFPT1	2.394
55213	RCBTB1	2.394
412	STS	2.394
181	AGRP	2.394
127391	TMCO2	2.394
6239	RREB1	2.394
9293	GPR52	2.394
29763	PACSIN3	2.394
29066	ZC3H7A	2.394
56160	NDNL2	2.394
58497	PRUNE	2.394
2893	GRIA4	2.394
130271	PLEKHH2	2.394
2886	GRB7	2.394
2543	GAGE1	2.394
51626	DYNC2LI1	2.394
5650	KLK7	2.394
5224	PGAM2	2.394
84696	ABHD1	2.394
55706	NDC1	2.394
4287	ATXN3	2.394
29984	RHOD	2.394
83941	TM2D1	2.394
5362	PLXNA2	2.394
164684	WBP2NL	2.394
10885	WDR3	2.394
80336	PABPC1L	2.394
7957	EPM2A	2.394
51293	CD320	2.394
29114	TAGLN3	2.394
282991	BLOC1S2	2.394
80224	NUBPL	2.394
2936	GSR	2.394
9110	MTMR4	2.394
8364	HIST1H4C	2.394
1289	COL5A1	2.394
117156	SCGB3A2	2.394
841	CASP8	2.394
55507	GPRC5D	2.394
8708	B3GALT1	2.394
54856	GON4L	2.394
100505573	INAFM2	2.394
53354	PANK1	2.394
389761	SPATA31D4	2.394
8510	MMP23B	2.394
2121	EVC	2.394
474	ATOH1	2.394
27115	PDE7B	2.394
26532	OR10H3	2.394
286144	TRIQK	2.394
27335	EIF3K	2.394
135152	B3GAT2	2.394
79625	NDNF	2.394
65982	ZSCAN18	2.394
9497	SLC4A7	2.394
4058	LTK	2.394
2953	GSTT2	2.394
6947	TCN1	2.394
6715	SRD5A1	2.394
256691	MAMDC2	2.394
8899	PRPF4B	2.394
79716	NPEPL1	2.394
8745	ADAM23	2.394
126393	HSPB6	2.394
145864	HAPLN3	2.394
201514	ZNF584	2.394
23151	GRAMD4	2.394
8884	SLC5A6	2.394
79048	SECISBP2	2.394
729852	UMAD1	2.394
7262	PHLDA2	2.394
152789	JAKMIP1	2.394
55186	SLC25A36	2.394
10681	GNB5	2.394
80131	LRRC8E	2.394
57402	S100A14	2.394
100129792	CCDC152	2.394
29781	NCAPH2	2.394
27035	NOX1	2.394
65094	JMJD4	2.394
10451	VAV3	2.394
100287478	USP17L21	2.394
4076	CAPRIN1	2.394
342357	ZKSCAN2	2.394
9545	RAB3D	2.394
3832	KIF11	2.394
51100	SH3GLB1	2.394
9563	H6PD	2.394
10671	DCTN6	2.394
1655	DDX5	2.394
158131	OR1Q1	2.394
260436	FDCSP	2.394
5077	PAX3	2.394
11269	DDX19B	2.394
5724	PTAFR	2.394
201254	STRA13	2.394
55585	UBE2Q1	2.394
79738	BBS10	2.394
283375	SLC39A5	2.394
116842	LEAP2	2.394
120376	COLCA2	2.394
55299	BRIX1	2.394
347454	SOWAHD	2.394
51241	COX16	2.394
55997	CFC1	2.394
9924	PAN2	2.394
1018	CDK3	2.394
259290	TAS2R31	2.394
78991	PCYOX1L	2.394
9765	ZFYVE16	2.394
741	ZNHIT2	2.394
2806	GOT2	2.394
59284	CACNG7	2.394
7439	BEST1	2.394
9241	NOG	2.394
7922	SLC39A7	2.394
100128927	ZBTB42	2.394
3880	KRT19	2.394
23240	KIAA0922	2.394
3192	HNRNPU	2.394
4294	MAP3K10	2.394
55588	MED29	2.394
10498	CARM1	2.394
5159	PDGFRB	2.394
1545	CYP1B1	2.394
55255	WDR41	2.394
8352	HIST1H3C	2.394
1058	CENPA	2.394
7561	ZNF14	2.394
10287	RGS19	2.394
55723	ASF1B	2.394
84667	HES7	2.394
1535	CYBA	2.394
3775	KCNK1	2.394
4978	OPCML	2.394
10891	PPARGC1A	2.394
8992	ATP6V0E1	2.394
84706	GPT2	2.394
200933	FBXO45	2.394
80742	PRR3	2.394
26083	TBC1D29	2.394
63929	XPNPEP3	2.394
2979	GUCA1B	2.394
10135	NAMPT	2.394
2961	GTF2E2	2.394
8824	CES2	2.394
115098	CCDC124	2.394
221927	BRAT1	2.394
11215	AKAP11	2.394
23066	CAND2	2.394
735	C9	2.394
346606	MOGAT3	2.394
402682	UFSP1	2.394
9889	ZBED4	2.394
57677	ZFP14	2.394
153222	CREBRF	2.394
1271	CNTFR	2.394
8654	PDE5A	2.394
6921	TCEB1	2.394
168455	CCDC71L	2.394
116987	AGAP1	2.394
10048	RANBP9	2.394
7324	UBE2E1	2.394
9710	KIAA0355	2.394
91543	RSAD2	2.394
57604	KIAA1456	2.394
30811	HUNK	2.394
6271	S100A1	2.394
79672	FN3KRP	2.394
26020	LRP10	2.394
5476	CTSA	2.394
1118	CHIT1	2.394
124872	B4GALNT2	2.394
5152	PDE9A	2.394
114786	XKR4	2.394
7732	RNF112	2.394
22850	ADNP2	2.394
6938	TCF12	2.394
55672	NBPF1	2.394
23312	DMXL2	2.394
5564	PRKAB1	2.394
344148	NCKAP5	2.394
390616	ANKRD34C	2.394
4191	MDH2	2.394
336	APOA2	2.394
1301	COL11A1	2.394
317781	DDX51	2.394
51119	SBDS	2.394
165324	UBXN2A	2.394
11122	PTPRT	2.394
85458	DIXDC1	2.394
5354	PLP1	2.394
79934	ADCK4	2.394
3687	ITGAX	2.394
221477	C6orf89	2.394
55311	ZNF444	2.394
728042	CT47A9	2.394
170954	PPP1R18	2.394
2824	GPM6B	2.394
63915	BLOC1S5	2.394
4597	MVD	2.394
10735	STAG2	2.394
85027	SMIM3	2.394
11144	DMC1	2.394
64224	HERPUD2	2.394
80235	PIGZ	2.394
126520	PLK5	2.394
79725	THAP9	2.394
4521	NUDT1	2.394
3208	HPCA	2.394
8976	WASL	2.394
84942	WDR73	2.394
100505993	TMEM210	2.394
2312	FLG	2.394
3096	HIVEP1	2.394
1030	CDKN2B	2.394
54490	UGT2B28	2.394
158880	USP51	2.394
570	BAAT	2.394
5191	PEX7	2.394
114790	STK11IP	2.394
3761	KCNJ4	2.394
883	CCBL1	2.394
4610	MYCL	2.394
647174	SERPINE3	2.394
6199	RPS6KB2	2.394
342897	NCCRP1	2.394
9352	TXNL1	2.394
84674	CARD6	2.394
10243	GPHN	2.394
55254	TMEM39A	2.394
54542	RC3H2	2.394
28984	RGCC	2.394
387804	VSTM5	2.394
51652	CHMP3	2.394
3275	PRMT2	2.394
8330	HIST1H2AK	2.394
5976	UPF1	2.394
80765	STARD5	2.394
23220	DTX4	2.394
3549	IHH	2.394
353133	LCE1C	2.394
389874	ZCCHC13	2.394
55719	SLF2	2.394
256302	NATD1	2.394
51112	TRAPPC12	2.394
134353	LSM11	2.394
8912	CACNA1H	2.394
253559	CADM2	2.394
65056	GPBP1	2.394
51200	CPA4	2.394
137797	LYPD2	2.394
55626	AMBRA1	2.394
9722	NOS1AP	2.394
79003	MIS12	2.394
4956	ODF1	2.394
23604	DAPK2	2.394
7049	TGFBR3	2.394
440563	HNRNPCL2	2.394
283237	TTC9C	2.394
23047	PDS5B	2.394
727837	SSX2B	2.394
116255	MOGAT1	2.394
374928	ZNF773	2.394
27315	PGAP2	2.394
654463	FER1L6	2.394
2307	FOXS1	2.394
2706	GJB2	2.394
6609	SMPD1	2.394
9200	HACD1	2.394
79590	MRPL24	2.394
5973	RENBP	2.394
389072	PLEKHM3	2.394
653282	CT47A7	2.394
79959	CEP76	2.394
26659	OR7A5	2.394
147323	STARD6	2.394
5502	PPP1R1A	2.394
644974	ALG1L2	2.394
8312	AXIN1	2.394
4969	OGN	2.394
4722	NDUFS3	2.394
6529	SLC6A1	2.394
84851	TRIM52	2.394
3487	IGFBP4	2.394
83752	LONP2	2.394
152002	XXYLT1	2.394
160492	LMNTD1	2.394
926	CD8B	2.394
60482	SLC5A7	2.394
90835	C16orf93	2.394
3024	HIST1H1A	2.394
6137	RPL13	2.394
65125	WNK1	2.394
374739	TEPP	2.394
662	BNIP1	2.394
8894	EIF2S2	2.394
23363	OBSL1	2.394
85379	KIAA1671	2.394
153768	PRELID2	2.394
80185	TTI2	2.394
10867	TSPAN9	2.394
3439	IFNA1	2.394
124	ADH1A	2.394
9821	RB1CC1	2.394
57167	SALL4	2.394
1429	CRYZ	2.394
4259	MGST3	2.394
2483	FRG1	2.394
3611	ILK	2.394
9480	ONECUT2	2.394
55760	DHX32	2.394
54866	PPP1R14D	2.394
57569	ARHGAP20	2.394
10507	SEMA4D	2.394
284433	OR10H5	2.394
84034	EMILIN2	2.394
83729	INHBE	2.394
51527	GSKIP	2.394
6694	SPP2	2.394
203062	TSNARE1	2.394
91392	ZNF502	2.394
7222	TRPC3	2.394
29085	PHPT1	2.394
9627	SNCAIP	2.394
317761	C14orf39	2.394
57413	TMIGD3	2.394
730005	SEC14L6	2.394
145497	LRRC74A	2.394
131583	FAM43A	2.394
4360	MRC1	2.394
3823	KLRC3	2.394
57596	BEGAIN	2.394
58489	ABHD17C	2.394
27346	TMEM97	2.394
57703	CWC22	2.394
338442	HCAR2	2.394
3162	HMOX1	2.394
79567	FAM65A	2.394
351	APP	2.394
11018	TMED1	2.394
6337	SCNN1A	2.394
9127	P2RX6	2.394
51434	ANAPC7	2.394
6863	TAC1	2.394
55851	PSENEN	2.394
57514	ARHGAP31	2.394
114299	PALM2	2.394
11052	CPSF6	2.394
196792	FAM24B	2.394
124590	USH1G	2.394
8322	FZD4	2.394
81328	OR4A15	2.394
10921	RNPS1	2.394
158297	SAXO1	2.394
7032	TFF2	2.394
3664	IRF6	2.394
56833	SLAMF8	2.394
51471	NAT8B	2.394
257240	KLHL34	2.394
643338	C15orf62	2.394
115024	NT5C3B	2.394
25937	WWTR1	2.394
79041	TMEM38A	2.394
10636	RGS14	2.394
6880	TAF9	2.394
56246	MRAP	2.394
91978	TPGS1	2.394
7033	TFF3	2.394
55532	SLC30A10	2.394
1734	DIO2	2.394
400793	C1orf226	2.394
81857	MED25	2.394
56104	PCDHGB1	2.394
219479	OR5R1	2.394
128853	DUSP15	2.394
127428	TCEANC2	2.394
2242	FES	2.394
374918	IGFL1	2.394
58189	WFDC1	2.394
644	BLVRA	2.394
3360	HTR4	2.394
5308	PITX2	2.394
114971	PTPMT1	2.394
92162	TMEM88	2.394
5275	SERPINB13	2.394
4185	ADAM11	2.394
1802	DPH2	2.394
2775	GNAO1	2.394
284340	CXCL17	2.394
7494	XBP1	2.394
90233	ZNF551	2.394
83982	IFI27L2	2.394
285605	DTWD2	2.394
84624	FNDC1	2.394
79968	WDR76	2.394
2273	FHL1	2.394
57616	TSHZ3	2.394
65117	RSRC2	2.394
64718	UNKL	2.394
3231	HOXD1	2.394
92335	STRADA	2.394
170689	ADAMTS15	2.394
3646	EIF3E	2.394
54972	TMEM132A	2.394
4857	NOVA1	2.394
4828	NMB	2.394
64756	ATPAF1	2.394
9231	DLG5	2.394
2331	FMOD	2.394
1902	LPAR1	2.394
646892	SH2D7	2.394
10766	TOB2	2.394
2001	ELF5	2.394
4357	MPST	2.394
120935	CCDC38	2.394
5796	PTPRK	2.394
10291	SF3A1	2.394
285800	PRR18	2.394
3695	ITGB7	2.394
56980	PRDM10	2.394
284161	GDPD1	2.394
84084	RAB6C	2.394
26517	TIMM13	2.394
56683	C21orf59	2.394
4669	NAGLU	2.394
10585	POMT1	2.394
353132	LCE1B	2.394
5173	PDYN	2.394
219654	ZCCHC24	2.394
5245	PHB	2.394
5453	POU3F1	2.394
3171	FOXA3	2.394
245928	DEFB114	2.394
427	ASAH1	2.394
5121	PCP4	2.394
51341	ZBTB7A	2.394
131177	FAM3D	2.394
4499	MT1M	2.394
4299	AFF1	2.394
11092	C9orf9	2.394
84173	ELMOD3	2.394
11001	SLC27A2	2.394
84899	TMTC4	2.394
197257	LDHD	2.394
51304	ZDHHC3	2.394
9043	SPAG9	2.394
84528	RHOXF2	2.394
23421	ITGB3BP	2.394
51082	POLR1D	2.394
1435	CSF1	2.394
9519	TBPL1	2.394
80264	ZNF430	2.394
54496	PRMT7	2.394
27338	UBE2S	2.394
483	ATP1B3	2.394
163049	ZNF791	2.394
4145	MATK	2.394
100507588	TGFBR3L	2.394
146433	IL34	2.394
79646	PANK3	2.394
404636	FAM45A	2.394
4698	NDUFA5	2.394
1540	CYLD	2.394
3075	CFH	2.394
7360	UGP2	2.394
27069	GHITM	2.394
84833	USMG5	2.394
399726	CASC10	2.394
124460	SNX20	2.394
163051	ZNF709	2.394
148932	MOB3C	2.394
58527	ABRACL	2.394
5218	CDK14	2.394
440712	C1orf186	2.394
6045	RNF2	2.394
10143	CLEC3A	2.394
138803	OR13C3	2.394
84148	KAT8	2.394
23411	SIRT1	2.394
285195	SLC9A9	2.394
83857	TMTC1	2.394
3852	KRT5	2.394
114897	C1QTNF1	2.394
140458	ASB5	2.394
4536	ND2	2.394
3361	HTR5A	2.394
90737	PAGE5	2.394
3593	IL12B	2.394
10863	ADAM28	2.394
114824	PNMA5	2.394
9162	DGKI	2.394
55165	CEP55	2.394
55192	DNAJC17	2.394
1409	CRYAA	2.394
81493	SYNC	2.394
25912	C1orf43	2.394
9521	EEF1E1	2.394
51530	ZC3HC1	2.394
27333	GOLIM4	2.394
9175	MAP3K13	2.394
9739	SETD1A	2.394
90649	ZNF486	2.394
25841	ABTB2	2.394
1088	CEACAM8	2.394
5373	PMM2	2.394
120406	NXPE2	2.394
100462977	MTRNR2L1	2.394
3603	IL16	2.394
151246	SGOL2	2.394
9819	TSC22D2	2.394
51205	ACP6	2.394
8458	TTF2	2.394
26039	SS18L1	2.394
93099	DMKN	2.394
10381	TUBB3	2.394
64499	TPSB2	2.394
84167	C19orf44	2.394
92597	MOB1B	2.394
3764	KCNJ8	2.394
7753	ZNF202	2.394
54438	GFOD1	2.394
8038	ADAM12	2.394
23398	PPWD1	2.394
10457	GPNMB	2.394
387601	SLC22A25	2.394
727830	SPATA31A3	2.394
140701	ABHD16B	2.394
6189	RPS3A	2.394
2517	FUCA1	2.394
28955	DEXI	2.394
80778	ZNF34	2.394
7547	ZIC3	2.394
127124	ATP6V1G3	2.394
283948	NHLRC4	2.394
22802	CLCA4	2.394
9882	TBC1D4	2.394
115752	DIS3L	2.394
90	ACVR1	2.394
4712	NDUFB6	2.394
54847	SIDT1	2.394
9717	SEC14L5	2.394
51380	CSAD	2.394
11174	ADAMTS6	2.394
92960	PEX11G	2.394
79819	WDR78	2.394
170622	COMMD6	2.394
27042	DIEXF	2.394
8554	PIAS1	2.394
10073	SNUPN	2.394
25797	QPCT	2.394
285989	ZNF789	2.394
51676	ASB2	2.394
245812	CNPY4	2.394
55770	EXOC2	2.394
389206	BEND4	2.394
27233	SULT1C4	2.394
23332	CLASP1	2.394
81691	LOC81691	2.394
4117	MAK	2.394
55872	PBK	2.394
11218	DDX20	2.394
7145	TNS1	2.394
113540	CMTM1	2.394
390445	OR5AU1	2.394
126069	ZNF491	2.394
26084	ARHGEF26	2.394
11036	GTF2A1L	2.394
84301	DDI2	2.394
6747	SSR3	2.394
135948	OR2F2	2.394
7764	ZNF217	2.394
23111	SPG20	2.394
9779	TBC1D5	2.394
4606	MYBPC2	2.394
11178	LZTS1	2.394
10870	HCST	2.394
84890	ADO	2.394
9481	SLC25A27	2.394
55335	NIPSNAP3B	2.394
133746	JMY	2.394
29121	CLEC2D	2.394
342979	PALM3	2.394
5581	PRKCE	2.394
2280	FKBP1A	2.394
273	AMPH	2.394
63941	NECAB3	2.394
23596	OPN3	2.394
160298	C11orf42	2.394
4991	OR1D2	2.394
147686	ZNF418	2.394
2262	GPC5	2.394
29128	UHRF1	2.394
2912	GRM2	2.394
131	ADH7	2.394
84542	KIAA1841	2.394
84725	PLEKHA8	2.394
55683	KANSL3	2.394
26355	FAM162A	2.394
10425	ARIH2	2.394
27125	AFF4	2.394
51422	PRKAG2	2.394
155382	VPS37D	2.394
378951	RBMY1J	2.394
151516	ASPRV1	2.394
60675	PROK2	2.394
23096	IQSEC2	2.394
6416	MAP2K4	2.394
85446	ZFHX2	2.394
3659	IRF1	2.394
84443	FRMPD3	2.394
79810	PTCD2	2.394
1788	DNMT3A	2.394
51192	CKLF	2.394
2186	BPTF	2.394
680	BRS3	2.394
8826	IQGAP1	2.394
117195	MRGPRX3	2.394
2783	GNB2	2.394
56649	TMPRSS4	2.394
127064	OR2T12	2.394
80019	UBTD1	2.394
57558	USP35	2.394
64789	EXO5	2.394
1997	ELF1	2.394
6650	CAPN15	2.394
2879	GPX4	2.394
200373	CFAP221	2.394
4043	LRPAP1	2.394
2077	ERF	2.394
2036	EPB41L1	2.394
115950	ZNF653	2.394
10266	RAMP2	2.394
157285	SGK223	2.394
125058	TBC1D16	2.394
55954	ZMAT5	2.394
339168	TMEM95	2.394
10573	MRPL28	2.394
128308	MRPL55	2.394
25790	CFAP45	2.394
51765	STK26	2.394
41	ASIC1	2.394
2887	GRB10	2.394
3084	NRG1	2.394
23195	MDN1	2.394
54758	KLHDC4	2.394
83992	CTTNBP2	2.394
23040	MYT1L	2.394
9612	NCOR2	2.394
389177	TMEM212	2.394
256710	GLIPR1L1	2.394
56652	C10orf2	2.394
284521	OR2L13	2.394
4292	MLH1	2.394
9058	SLC13A2	2.394
84525	HOPX	2.394
2664	GDI1	2.394
60561	RINT1	2.394
4245	MGAT1	2.394
51499	TRIAP1	2.394
896	CCND3	2.394
127294	MYOM3	2.394
124565	SLC38A10	2.394
55117	SLC6A15	2.394
5539	PPY	2.394
345757	FAM174A	2.394
23185	LARP4B	2.394
54873	PALMD	2.394
6470	SHMT1	2.394
5045	FURIN	2.394
3609	ILF3	2.394
9341	VAMP3	2.394
55227	LRRC1	2.394
1672	DEFB1	2.394
80832	APOL4	2.394
2768	GNA12	2.394
23014	FBXO21	2.394
9526	MPDU1	2.394
389493	NUPR1L	2.394
1102	RCBTB2	2.394
7027	TFDP1	2.394
1478	CSTF2	2.394
439	ASNA1	2.394
345651	ACTBL2	2.394
51537	MTFP1	2.394
8676	STX11	2.394
115708	TRMT61A	2.394
54981	NMRK1	2.394
23469	PHF3	2.394
386682	KRTAP10-3	2.394
253582	TMEM244	2.394
338322	NLRP10	2.394
6598	SMARCB1	2.394
5826	ABCD4	2.394
22797	TFEC	2.394
63035	BCORL1	2.394
7105	TSPAN6	2.394
54680	ZNHIT6	2.394
54928	IMPAD1	2.394
4790	NFKB1	2.394
3652	IPP	2.394
9278	ZBTB22	2.394
29097	CNIH4	2.394
374378	GALNT18	2.394
148	ADRA1A	2.394
6453	ITSN1	2.394
84337	ELOF1	2.394
7709	ZBTB17	2.394
8383	OR1A1	2.394
146279	TEKT5	2.394
81539	SLC38A1	2.394
726	CAPN5	2.394
2703	GJA8	2.394
55156	ARMC1	2.394
6659	SOX4	2.394
728318	KRTAP9-1	2.394
157	ADRBK2	2.394
2009	EML1	2.394
317701	VN1R2	2.394
1909	EDNRA	2.394
7179	TPTE	2.394
58480	RHOU	2.394
22905	EPN2	2.394
163154	PRR22	2.394
654254	ZNF732	2.394
2627	GATA6	2.394
1213	CLTC	2.394
352954	GATS	2.394
643988	C1orf233	2.394
27324	TOX3	2.394
6323	SCN1A	2.394
6209	RPS15	2.394
9209	LRRFIP2	2.394
728137	TSPY3	2.394
1990	CELA1	2.394
84530	SRRM4	2.394
10319	LAMC3	2.394
114926	SMIM19	2.394
7699	ZNF140	2.394
79873	NUDT18	2.394
55079	FEZF2	2.394
51744	CD244	2.394
9022	CLIC3	2.394
440699	LRRC52	2.394
93233	CCDC114	2.394
6205	RPS11	2.394
84817	TXNDC17	2.394
283080	C10orf126	2.394
284467	FAM19A3	2.394
166752	FREM3	2.394
5141	PDE4A	2.394
343069	HNRNPCL1	2.394
10362	HMG20B	2.394
952	CD38	2.394
6758	SSX5	2.394
4804	NGFR	2.394
9636	ISG15	2.394
90485	ZNF835	2.394
26064	RAI14	2.394
4158	MC2R	2.394
644096	SDHAF1	2.394
283985	FADS6	2.394
90332	EXOC3L2	2.394
54737	MPHOSPH8	2.394
57649	PHF12	2.394
51364	ZMYND10	2.394
26291	FGF21	2.394
5949	RBP3	2.394
140873	C20orf173	2.394
8729	GBF1	2.394
80864	EGFL8	2.394
84189	SLITRK6	2.394
84446	BRSK1	2.394
3948	LDHC	2.394
66000	TMEM108	2.394
55009	C19orf24	2.394
7701	ZNF142	2.394
441272	SPDYE3	2.394
55240	STEAP3	2.394
51074	APIP	2.394
4016	LOXL1	2.394
10006	ABI1	2.394
94101	ORMDL1	2.394
100507290	ZNF865	2.394
25903	OLFML2B	2.394
168391	GALNTL5	2.394
7411	VBP1	2.394
9027	NAT8	2.394
83642	SELO	2.394
5695	PSMB7	2.394
7163	TPD52	2.394
57198	ATP8B2	2.394
401505	TOMM5	2.394
79726	WDR59	2.394
258	AMBN	2.394
199990	FAAP20	2.394
170370	FAM170B	2.394
339122	RAB43	2.394
81466	OR2L5	2.394
10098	TSPAN5	2.394
55844	PPP2R2D	2.394
59351	PBOV1	2.394
79637	ARMC7	2.394
30832	ZNF354C	2.394
83896	KRTAP3-1	2.394
54537	FAM35A	2.394
141	ADPRH	2.394
80739	C6orf25	2.394
26271	FBXO5	2.394
29117	BRD7	2.394
254950	KRTAP15-1	2.394
10911	UTS2	2.394
3590	IL11RA	2.394
1060	CENPC	2.394
3759	KCNJ2	2.394
2104	ESRRG	2.394
2894	GRID1	2.394
55796	MBNL3	2.394
4221	MEN1	2.394
10758	TRAF3IP2	2.394
389114	ZNF662	2.394
8644	AKR1C3	2.394
55628	ZNF407	2.394
2526	FUT4	2.394
972	CD74	2.394
53831	GPR84	2.394
81576	CCDC130	2.394
150684	COMMD1	2.394
10003	NAALAD2	2.394
29880	ALG5	2.394
201626	PDE12	2.394
143098	MPP7	2.394
3420	IDH3B	2.394
55800	SCN3B	2.394
5130	PCYT1A	2.394
728072	CT47A5	2.394
147166	TRIM16L	2.394
5684	PSMA3	2.394
25998	IBTK	2.394
6261	RYR1	2.394
374454	KRT77	2.394
344658	SAMD7	2.394
54903	MKS1	2.394
4869	NPM1	2.394
2812	GP1BB	2.394
8349	HIST2H2BE	2.394
200810	ALG1L	2.394
285855	RPL7L1	2.394
2830	GPR6	2.394
3670	ISL1	2.394
7391	USF1	2.394
79684	MSANTD2	2.394
2969	GTF2I	2.394
643803	KRTAP24-1	2.394
149708	WFDC5	2.394
78988	MRPL57	2.394
149018	LELP1	2.394
150372	NFAM1	2.394
11034	DSTN	2.394
4909	NTF4	2.394
100533106	ZHX1-C8orf76	2.394
144321	GLIPR1L2	2.394
5148	PDE6G	2.394
129831	RBM45	2.394
27113	BBC3	2.394
3065	HDAC1	2.394
493911	PHOSPHO2	2.394
7621	ZNF70	2.394
344901	OSTN	2.394
57156	TMEM63C	2.394
100505679	UBE2Q2L	2.394
333929	SNAI3	2.394
285231	FBXW12	2.394
10743	RAI1	2.394
1345	COX6C	2.394
23029	RBM34	2.394
23767	FLRT3	2.394
758	MPPED1	2.394
14	AAMP	2.394
84640	USP38	2.394
219968	OR5B21	2.394
2587	GALR1	2.394
29800	ZDHHC1	2.394
10898	CPSF4	2.394
9556	C14orf2	2.394
25946	ZNF385A	2.394
2328	FMO3	2.394
51124	IER3IP1	2.394
3786	KCNQ3	2.394
83876	MRO	2.394
7867	MAPKAPK3	2.394
80258	EFHC2	2.394
284391	ZNF844	2.394
387914	SHISA2	2.394
4580	MTX1	2.394
91947	ARRDC4	2.394
10011	SRA1	2.394
5213	PFKM	2.394
10273	STUB1	2.394
3554	IL1R1	2.394
6158	RPL28	2.394
10127	ZNF263	2.394
119180	LYZL2	2.394
6936	GCFC2	2.394
118427	OLFM3	2.394
9191	DEDD	2.394
1000	CDH2	2.394
9818	NUPL1	2.394
11222	MRPL3	2.394
221823	PRPS1L1	2.394
27181	SIGLEC8	2.394
79893	GGNBP2	2.394
140876	FAM65C	2.394
3955	LFNG	2.394
79783	SUGCT	2.394
5367	PMCH	2.394
259197	NCR3	2.394
22974	TPX2	2.394
119	ADD2	2.394
54980	C2orf42	2.394
64132	XYLT2	2.394
4438	MSH4	2.394
54899	PXK	2.394
29887	SNX10	2.394
55039	TRMT12	2.394
83931	STK40	2.394
84992	PIGY	2.394
8904	CPNE1	2.394
2597	GAPDH	2.394
84650	EBPL	2.394
5441	POLR2L	2.394
8370	HIST2H4A	2.394
79607	FAM118B	2.394
340980	OR52B6	2.394
1871	E2F3	2.394
284069	FAM171A2	2.394
10966	RAB40B	2.394
92344	GORAB	2.394
342926	ZNF677	2.394
79930	DOK3	2.394
8517	IKBKG	2.394
55664	CDC37L1	2.394
57584	ARHGAP21	2.394
64770	CCDC14	2.394
3912	LAMB1	2.394
10908	PNPLA6	2.394
6637	SNRPG	2.394
51015	ISOC1	2.394
57642	COL20A1	2.394
9747	TCAF1	2.394
1844	DUSP2	2.394
548644	POLR2J3	2.394
116966	WDR17	2.394
347527	ARSH	2.394
80829	ZFP91	2.394
7186	TRAF2	2.394
51447	IP6K2	2.394
10346	TRIM22	2.394
100170765	ERICH4	2.394
252969	NEIL2	2.394
25932	CLIC4	2.394
93550	ZFAND4	2.394
132228	LSMEM2	2.394
7965	AIMP2	2.394
79183	TTPAL	2.394
139341	FUNDC1	2.394
124801	LSM12	2.394
7593	MZF1	2.394
252995	FNDC5	2.394
100505385	IQCJ-SCHIP1	2.394
10847	SRCAP	2.394
23307	FKBP15	2.394
5730	PTGDS	2.394
1260	CNGA2	2.394
138429	PIP5KL1	2.394
353333	KRTAP10-10	2.394
2220	FCN2	2.394
100132396	ZNF705B	2.394
1591	CYP24A1	2.394
51726	DNAJB11	2.394
5606	MAP2K3	2.394
1390	CREM	2.394
55902	ACSS2	2.394
100287932	TIMM23	2.394
153572	IRX2	2.394
1977	EIF4E	2.394
2023	ENO1	2.394
644943	RASSF10	2.394
9788	MTSS1	2.394
3445	IFNA8	2.394
54913	RPP25	2.394
1825	DSC3	2.394
1669	DEFA4	2.394
23137	SMC5	2.394
90625	ERVH48-1	2.394
1285	COL4A3	2.394
150468	CKAP2L	2.394
7335	UBE2V1	2.394
1959	EGR2	2.394
55693	KDM4D	2.394
132204	SYNPR	2.394
89797	NAV2	2.394
11167	FSTL1	2.394
344558	SH3RF3	2.394
113146	AHNAK2	2.394
10803	CCR9	2.394
6383	SDC2	2.394
8621	CDK13	2.394
22985	ACIN1	2.394
7059	THBS3	2.394
151871	DPPA2	2.394
85300	ATCAY	2.394
5119	CHMP1A	2.394
4861	NPAS1	2.394
256714	MAP7D2	2.394
9246	UBE2L6	2.394
339559	ZFP69	2.394
222537	HS3ST5	2.394
8139	GAN	2.394
2210	FCGR1B	2.394
80045	GPR157	2.394
9646	CTR9	2.394
79664	ICE2	2.394
55321	TMEM74B	2.394
9686	VGLL4	2.394
10621	POLR3F	2.394
57325	CSRP2BP	2.394
56901	NDUFA4L2	2.394
22874	PLEKHA6	2.394
285973	ATG9B	2.394
25862	USP49	2.394
8530	CST7	2.394
55207	ARL8B	2.394
28513	CDH19	2.394
84033	OBSCN	2.394
8491	MAP4K3	2.394
221935	SDK1	2.394
202559	KHDRBS2	2.394
8999	CDKL2	2.394
390748	PABPN1L	2.394
29919	C18orf8	2.394
55357	TBC1D2	2.394
25873	RPL36	2.394
10251	SPRY3	2.394
389541	LAMTOR4	2.394
4626	MYH8	2.394
7993	UBXN8	2.394
8431	NR0B2	2.394
5885	RAD21	2.394
25800	SLC39A6	2.394
26253	CLEC4E	2.394
83394	PITPNM3	2.394
221302	ZUFSP	2.394
83661	MS4A8	2.394
6235	RPS29	2.394
9875	URB1	2.394
79948	LPPR3	2.394
54843	SYTL2	2.394
170680	PSORS1C2	2.394
23172	FAM175B	2.394
51725	FBXO40	2.394
26015	RPAP1	2.394
100287226	ZNF729	2.394
198437	LKAAEAR1	2.394
340204	CLPSL1	2.394
2817	GPC1	2.394
116238	TLCD1	2.394
79465	ULBP3	2.394
57704	GBA2	2.394
126669	SHE	2.394
646424	SPINK8	2.394
25778	DSTYK	2.394
1605	DAG1	2.394
497190	CLEC18B	2.394
6892	TAPBP	2.394
94056	SYAP1	2.394
6373	CXCL11	2.394
1945	EFNA4	2.394
969	CD69	2.394
196446	MYRFL	2.394
23536	ADAT1	2.394
100129278	TDRD15	2.394
9477	MED20	2.394
4207	MEF2BNB-MEF2B	2.394
4089	SMAD4	2.394
1501	CTNND2	2.394
286046	XKR6	2.394
549	AUH	2.394
27161	AGO2	2.394
112479	ERI2	2.394
130557	ZNF513	2.394
338675	OR5AP2	2.394
25895	METTL21B	2.394
22917	ZP1	2.394
946	SIGLEC6	2.394
55561	CDC42BPG	2.394
55100	WDR70	2.394
1361	CPB2	2.394
81061	OR11H1	2.394
23601	CLEC5A	2.394
161357	MDGA2	2.394
55328	RNLS	2.394
51186	WBP5	2.394
153657	TTC23L	2.394
3678	ITGA5	2.394
85481	PSKH2	2.394
24141	LAMP5	2.394
196374	KRT78	2.394
51061	TXNDC11	2.394
583	BBS2	2.394
7852	CXCR4	2.394
7535	ZAP70	2.394
8817	FGF18	2.394
8808	IL1RL2	2.394
2304	FOXE1	2.394
23308	ICOSLG	2.394
64801	ARV1	2.394
23284	ADGRL3	2.394
63891	RNF123	2.394
144568	A2ML1	2.394
441282	AKR1B15	2.394
4990	SIX6	2.394
57126	CD177	2.394
30827	CXXC1	2.394
85413	SLC22A16	2.394
10947	AP3M2	2.394
26716	OR2H1	2.394
3827	KNG1	2.394
4589	MUC7	2.394
2992	GYG1	2.394
2639	GCDH	2.394
55350	VNN3	2.394
29109	FHOD1	2.394
26664	OR7C1	2.394
220992	ZNF485	2.394
163	AP2B1	2.394
23743	BHMT2	2.394
51257	2022-03-02	2.394
84792	FAM220A	2.394
8838	WISP3	2.394
8022	LHX3	2.394
30814	PLA2G2E	2.394
51567	TDP2	2.394
57644	MYH7B	2.394
3859	KRT12	2.394
197342	EME2	2.394
51747	LUC7L3	2.394
1577	CYP3A5	2.394
55911	APOBR	2.394
1572	CYP2F1	2.394
7511	XPNPEP1	2.394
151306	GPBAR1	2.394
886	CCKAR	2.394
51068	NMD3	2.394
25979	DHRS7B	2.394
4733	DRG1	2.394
1329	COX5B	2.394
2835	GPR12	2.394
51373	MRPS17	2.394
60592	SCOC	2.394
3728	JUP	2.394
3568	IL5RA	2.394
729515	TMEM242	2.394
54825	CDHR2	2.394
320	APBA1	2.394
5663	PSEN1	2.394
6561	SLC13A1	2.394
80314	EPC1	2.394
811	CALR	2.394
55806	HR	2.394
819	CAMLG	2.394
3680	ITGA9	2.394
51507	RTFDC1	2.394
121275	OR10AD1	2.394
3768	KCNJ12	2.394
205147	AMER3	2.394
353174	ZACN	2.394
5095	PCCA	2.394
2578	GAGE6	2.394
23108	RAP1GAP2	2.394
164656	TMPRSS6	2.394
79169	C1orf35	2.394
131601	TPRA1	2.394
23301	EHBP1	2.394
4781	NFIB	2.394
4716	NDUFB10	2.394
221830	TWISTNB	2.394
7520	XRCC5	2.394
347411	MPC1L	2.394
92154	MTSS1L	2.394
27443	CECR2	2.394
1378	CR1	2.394
57113	TRPC7	2.394
1054	CEBPG	2.394
27292	DIMT1	2.394
79290	OR13A1	2.394
3797	KIF3C	2.394
10397	NDRG1	2.394
7579	ZSCAN20	2.394
100113407	TMEM170B	2.394
3052	HCCS	2.394
29991	OBP2A	2.394
26167	PCDHB5	2.394
5899	RALB	2.394
9663	LPIN2	2.394
729359	PLIN4	2.394
64895	PAPOLG	2.394
1311	COMP	2.394
338599	DUPD1	2.394
11081	KERA	2.394
729355	TP53TG3B	2.394
56943	ENY2	2.394
701	BUB1B	2.394
340156	MYLK4	2.394
55139	ANKZF1	2.394
643418	LIPN	2.394
2539	G6PD	2.394
64327	LMBR1	2.394
2779	GNAT1	2.394
114757	CYGB	2.394
85439	STON2	2.394
29942	PURG	2.394
5573	PRKAR1A	2.394
2491	CENPI	2.394
130074	FAM168B	2.394
199870	FAM76A	2.394
10314	LANCL1	2.394
120066	OR5P3	2.394
3105	HLA-A	2.394
79699	ZYG11B	2.394
9793	CKAP5	2.394
1775	DNASE1L2	2.394
140612	ZFP28	2.394
84190	METTL25	2.394
2530	FUT8	2.394
100527963	PMF1-BGLAP	2.394
118491	CFAP70	2.394
80863	PRRT1	2.394
1512	CTSH	2.394
64236	PDLIM2	2.394
2946	GSTM2	2.394
10678	B3GNT2	2.394
84256	FLYWCH1	2.394
728498	GOLGA8H	2.394
328	APEX1	2.394
80095	ZNF606	2.394
53349	ZFYVE1	2.394
729574	FAM231A	2.394
26268	FBXO9	2.394
117532	TMC2	2.394
56928	SPPL2B	2.394
84952	CGNL1	2.394
54884	RETSAT	2.394
7711	ZNF155	2.394
8425	LTBP4	2.394
5001	ORC5	2.394
11132	CAPN10	2.394
9605	VPS9D1	2.394
3263	HPX	2.394
23367	LARP1	2.394
192286	HIGD2A	2.394
51463	GPR89B	2.394
9833	MELK	2.394
4108	MAGEA9	2.394
389075	RESP18	2.394
22993	HMGXB3	2.394
83483	PLVAP	2.394
23456	ABCB10	2.394
28991	COMMD5	2.394
80024	SLC8B1	2.394
1687	DFNA5	2.394
7404	UTY	2.394
22843	PPM1E	2.394
1188	CLCNKB	2.394
3142	HLX	2.394
149111	CNIH3	2.394
7455	ZAN	2.394
221191	PRSS54	2.394
54805	CNNM2	2.394
7293	TNFRSF4	2.394
374899	ZNF829	2.394
374569	ASPG	2.394
92999	ZBTB47	2.394
219431	OR4S2	2.394
54936	ADPRHL2	2.394
64746	ACBD3	2.394
11274	USP18	2.394
140890	SREK1	2.394
23406	COTL1	2.394
23760	PITPNB	2.394
83604	TMEM47	2.394
200014	CC2D1B	2.394
80347	COASY	2.394
54552	GNL3L	2.394
2717	GLA	2.394
8484	GALR3	2.394
83741	TFAP2D	2.394
771	CA12	2.394
148223	C19orf25	2.394
221908	PPP1R35	2.394
84516	DCTN5	2.394
392465	GLOD5	2.394
8706	B3GALNT1	2.394
6495	SIX1	2.394
340146	SLC35D3	2.394
6558	SLC12A2	2.394
1586	CYP17A1	2.394
51317	PHF21A	2.394
339669	TEX33	2.394
7918	GPANK1	2.394
1456	CSNK1G3	2.394
3561	IL2RG	2.394
91181	NUP210L	2.394
64856	VWA1	2.394
613227	HIGD1C	2.394
257044	C1orf101	2.394
53828	FXYD4	2.394
7001	PRDX2	2.394
84179	MFSD7	2.394
10940	POP1	2.394
3643	INSR	2.394
2346	FOLH1	2.394
55754	TMEM30A	2.394
2195	FAT1	2.394
2555	GABRA2	2.394
5202	PFDN2	2.394
57696	DDX55	2.394
149095	DCST1	2.394
29074	MRPL18	2.394
337970	KRTAP19-3	2.394
79885	HDAC11	2.394
55171	TBCCD1	2.394
57105	CYSLTR2	2.394
29079	MED4	2.394
100507055	LRCOL1	2.394
219557	C7orf62	2.394
4084	MXD1	2.394
963	CD53	2.394
85477	SCIN	2.394
57862	ZNF410	2.394
147040	KCTD11	2.394
10199	MPHOSPH10	2.394
56605	ERO1B	2.394
284349	ZNF283	2.394
23254	KAZN	2.394
6340	SCNN1G	2.394
112724	RDH13	2.394
55633	TBC1D22B	2.394
5627	PROS1	2.394
56139	PCDHA10	2.394
8798	DYRK4	2.394
22929	SEPHS1	2.394
165545	DQX1	2.394
55262	C7orf43	2.394
2697	GJA1	2.394
54741	LEPROT	2.394
6423	SFRP2	2.394
126017	ZNF813	2.394
64320	RNF25	2.394
23352	UBR4	2.394
65258	MPPE1	2.394
283629	TSSK4	2.394
64375	IKZF4	2.394
9991	PTBP3	2.394
23237	ARC	2.394
22824	HSPA4L	2.394
5594	MAPK1	2.394
8266	UBL4A	2.394
6830	SUPT6H	2.394
54808	DYM	2.394
729092	AGAP5	2.394
22930	RAB3GAP1	2.394
11186	RASSF1	2.394
4650	MYO9B	2.394
55656	INTS8	2.394
55068	ENOX1	2.394
23231	SEL1L3	2.394
27090	ST6GALNAC4	2.394
84340	GFM2	2.394
84888	SPPL2A	2.394
83719	YPEL3	2.394
7153	TOP2A	2.394
26056	RAB11FIP5	2.394
283	ANG	2.394
5860	QDPR	2.394
115123	2022-03-03	2.394
54578	UGT1A6	2.394
100507050	TPBGL	2.394
79033	ERI3	2.394
100288687	DUX4	2.394
63928	CHP2	2.394
7040	TGFB1	2.394
9868	TOMM70A	2.394
9318	COPS2	2.394
55616	ASAP3	2.394
401067	IQCF3	2.394
100534012	TNFAIP8L2-SCNM1	2.394
286410	ATP11C	2.394
254173	TTLL10	2.394
84895	FAM73B	2.394
90843	TCEAL8	2.394
9669	EIF5B	2.394
7638	ZNF221	2.394
23075	SWAP70	2.394
4745	NELL1	2.394
4817	NIT1	2.394
653140	FAM228A	2.394
54785	C17orf59	2.394
26339	OR5K1	2.394
27249	MMADHC	2.394
26232	FBXO2	2.394
140596	DEFB104A	2.394
58533	SNX6	2.394
145258	GSC	2.394
4068	SH2D1A	2.394
6002	RGS12	2.394
23519	ANP32D	2.394
57600	FNIP2	2.394
84221	SPATC1L	2.394
1021	CDK6	2.394
64167	ERAP2	2.394
5094	PCBP2	2.394
55823	VPS11	2.394
201475	RAB12	2.394
9420	CYP7B1	2.394
83932	SPRTN	2.394
285313	IGSF10	2.394
5990	RFX2	2.394
64417	C5orf28	2.394
4821	NKX2-2	2.394
948	CD36	2.394
8239	USP9X	2.394
253970	SFTA3	2.394
226	ALDOA	2.394
25824	PRDX5	2.394
63894	VIPAS39	2.394
4982	TNFRSF11B	2.394
7473	WNT3	2.394
23671	TMEFF2	2.394
388701	C1orf189	2.394
3229	HOXC13	2.394
8209	C21orf33	2.394
26524	LATS2	2.394
139728	PNCK	2.394
374920	C19orf68	2.394
56128	PCDHB8	2.394
10657	KHDRBS1	2.394
348110	ARPIN	2.394
79693	YRDC	2.394
121549	ASCL4	2.394
152007	GLIPR2	2.394
6505	SLC1A1	2.394
339416	ANKRD45	2.394
22895	RPH3A	2.394
112487	DTD2	2.394
57590	WDFY1	2.394
3632	INPP5A	2.394
220158	GTSCR1	2.394
728082	CT47A3	2.394
6953	TCP10	2.394
6812	STXBP1	2.394
2046	EPHA8	2.394
64843	ISL2	2.394
8682	PEA15	2.394
91522	COL23A1	2.394
23270	TSPYL4	2.394
56121	PCDHB15	2.394
6302	TSPAN31	2.394
11253	MAN1B1	2.394
8858	PROZ	2.394
80303	EFHD1	2.394
387748	OR56B1	2.394
350383	GPR142	2.394
6604	SMARCD3	2.394
10203	CALCRL	2.394
138050	HGSNAT	2.394
4232	MEST	2.394
641339	ZNF674	2.394
55002	TMCO3	2.394
9508	ADAMTS3	2.394
1445	CSK	2.394
122060	SLAIN1	2.394
441061	2022-03-11	2.394
778	CACNA1F	2.394
27341	RRP7A	2.394
[truncated: 14,384 more rows]

## Sheet: CTD
Gene Symbol	Gene ID	Interaction Count	Organism Count
NOS3	4846	13	2
HMOX1	3162	10	2
NFE2L2	4780	8	2
CASP3	836	7	3
BCL2	596	6	2
GCLC	2729	6	2
TNF	7124	6	3
RELA	5970	5	3
CAT	847	4	2
ESR2	2100	4	2
FYN	2534	4	2
ALB	213	3	2
BAX	581	3	2
MAPK8	5599	3	1
MTOR	2475	3	2
NFKB1	4790	3	1
NOS2	4843	3	2
PARP1	142	3	2
PGR	5241	3	2
PPARA	5465	3	1
PTGS2	5743	3	2
RARA	5914	3	1
RPS6KB1	6198	3	2
TGFB1	7040	3	2
ACTA2	59	2	1
AKT1	207	2	1
BIRC5	332	2	1
CASP8	841	2	1
CCN2	1490	2	1
COL1A1	1277	2	1
COX1	4512	2	2
CYP2E1	1571	2	1
EIF4EBP1	1978	2	1
FASLG	356	2	1
GDNF	2668	2	1
GPER1	2852	2	1
GSK3B	2932	2	2
GSR	2936	2	2
ICAM1	3383	2	1
IGF1	3479	2	2
IL6	3569	2	1
MAPK1	5594	2	2
MAPK3	5595	2	2
NQO1	1728	2	1
PML	5371	2	1
PPARG	5468	2	2
PRKCD	5580	2	1
SLC25A4	291	2	1
SLC25A5	292	2	1
ACACA	31	1	1
ACACB	32	1	1
ACADM	34	1	1
ACHE	43	1	1
ACLY	47	1	1
ACOX1	51	1	1
ALDH1A2	8854	1	1
AQP1	358	1	1
AQP3	360	1	1
AR	367	1	1
BMP2B	30632	1	1
CDH1	999	1	1
COL3A1	1281	1	1
COX2	4513	1	1
COX3	4514	1	1
CPT1A	1374	1	1
CREB1	1385	1	1
CYGB	114757	1	1
CYP7A1	1581	1	1
DSG3	1830	1	1
EGF	1950	1	1
ESR1	2099	1	1
FASN	2194	1	1
FBN1	2200	1	1
FBN2	2201	1	1
FGF1	2246	1	1
FOS	2353	1	1
GPI	2821	1	1
GPT	2875	1	1
HAS1	3036	1	1
HK1	3098	1	1
HMGCR	3156	1	1
HSPB1	3315	1	1
IFNG	3458	1	1
IL1A	3552	1	1
IL1B	3553	1	1
INSR	3643	1	1
KL	9365	1	1
LDHA	3939	1	1
LDLR	3949	1	1
LIF	3976	1	1
MAPK9	5601	1	1
MC1R	4157	1	1
MMP2	4313	1	1
MYC	4609	1	1
NFKBIA	4792	1	1
NOS1	4842	1	1
PFKP	5214	1	1
PGAM1	5223	1	1
PLOD3	8985	1	1
PPARGC1A	10891	1	1
PTGER1	5731	1	1
SIRT1	23411	1	1
SLC2A1	6513	1	1
SOD3	6649	1	1
SQSTM1	8878	1	1
SRD5A2	6716	1	1
SREBF1	6720	1	1
TBX1	6899	1	1
TERT	7015	1	1
TIMP1	7076	1	1
TLR4	7099	1	1
TPT1	7178	1	1
TXN	7295	1	1
TYRP1	7306	1	1
UCP2	7351	1	1
UGT1A1	54658	1	1
UGT1A10	54575	1	1
UGT1A3	54659	1	1
UGT1A6	54578	1	1
UGT1A7	54577	1	1
UGT1A8	54576	1	1
UGT1A9	54600	1	1
VEGFA	7422	1	1
XIAP	331	1	1

## Sheet: pharmmapper
Ligand: 5281807
Pharma Model	Num Feature	Fit	Norm Fit	Num Hydrophobic	Num HB Acceptor	Num HB Donor	Num Positive	Num Negative	Num Aromatic	Name	Class	Uniplot	Function	Disease	Idication
1igr_A_cavity_1	16	7.273	0.4546	6	2	2	6	0	0	Insulin-like growth factor 1 receptor	HORMONE RECEPTOR	IGF1R_HUMAN	This receptor binds insulin-like growth factor 1 (IGF1) with a high affinity and IGF2 with a lower affinity. It has a tyrosine-protein kinase activity, which is necessary for the activation of the IGF1-stimulated downstream signaling cascade.	Defects in IGF1R may be a cause in some cases of resistance to insulin-like growth factor 1 (IGF1 resistance) [MIM:270450]. IGF1 resistance is a gowth deficiency disorder characterized by intrauterine growth retardation and poor postnatal growth accompanied with increased plasma IGF1.	Endocrine disease;Neuroendocrine tumor;Chronic myelocytic leukemia;Cerebrovascular ischemia;Restenosis;Breast tumor;Pancreas tumor;Esophageal disease;Central nervous system disease;Prostate tumor;Acromegaly;Renal tumor;Solid tumor;Psoriasis;Pancreatitis;Cancer;Rheumatoid arthritis;Non-small-cell lung cancer;Neurodegenerative disease;Multiple myeloma;Colorectal tumor;Diabetes mellitus;Hypertension…
1v9x_A_cavity_1	13	6.091	0.4686	5	1	3	0	4	0	Poly [ADP-ribose] polymerase 1	NONE	Q9ZP54	NONE	NONE	NONE
2zv8_A_cavity_2	11	6.008	0.5462	5	2	1	3	0	0	Tyrosine-protein kinase Lyn	NONE	P25911	NONE	NONE	NONE
3bpt_A_cavity_3	13	5.772	0.444	6	2	2	3	0	0	3-hydroxyisobutyryl-CoA hydrolase, mitochondrial	NONE	Q6NVY1	NONE	NONE	NONE
2iwg_E_cavity_1	10	5.702	0.5702	4	0	3	3	0	0	52 kDa Ro protein	IMMUNOGLOBULIN DOMAIN	RO52_HUMAN	Ribonucleoprotein particle composed of a single polypeptide and one of four small RNA molecules. It is present in all mammalian cells studied but has no known function. At least two isoforms are present in nucleated and red blood cells, and tissue specifi	Sera from patients with systemic lupus erythematosus (SLE) or primary Sjoegren syndrome often contain antibodies that react with normal cellular RO protein as if this antigen was foreign.	NONE
1jh6_A_cavity_1	11	5.284	0.4804	5	1	2	0	3	0	Cyclic phosphodiesterase	NONE	O04147	Involved in cyclic-nucleotide phosphodiesterase activity	NONE	NONE
2nn6_B_cavity_1	11	5.132	0.4665	4	2	2	3	0	0	Exosome complex exonuclease RRP45	NONE	Q06265	NONE	NONE	NONE
2a9e_A_cavity_2	9	4.935	0.5484	3	2	1	0	3	0	Catalase	NONE	P77872	Involved in catalase activity	NONE	NONE
1emy_A_cavity_1	10	4.655	0.4655	6	1	1	0	2	0	Myoglobin	NONE	P02186	NONE	NONE	NONE
1s5a_A_cavity_1	7	4.645	0.6636	3	1	1	2	0	0	Hypothetical protein yesE	NONE	O31511	NONE	NONE	NONE
1hyh_C_cavity_2	9	4.559	0.5065	4	2	1	0	2	0	L-2-hydroxyisocaproate dehydrogenase	NONE	P14295	Involved in oxidoreductase activity, acting on the CH-OH group of donors, NAD or NADP as acceptor	NONE	NONE
1e6v_F_cavity_1	9	4.476	0.4973	4	2	1	0	2	0	Methyl-coenzyme M reductase I subunit alpha	NONE	Q49605	NONE	NONE	NONE
2bu7_A_cavity_3	9	4.425	0.4916	3	2	1	1	2	0	[Pyruvate dehydrogenase [lipoamide]] kinase isozyme 2, mitochondrial	TRANSFERASE	PDK2_HUMAN	Inhibits the mitochondrial pyruvate dehydrogenase complex by phosphorylation of the E1 alpha subunit, thus contributing to the regulation of glucose metabolism.	NONE	NONE
1unh_A_cavity_1	9	4.394	0.4882	3	1	2	3	0	0	Cyclin-dependent kinase 5 activator 1	COMPLEX(KINASE/ACTIVATOR)	CD5R1_HUMAN	p35 is a neuron specific activator of CDK5. The complex p35/CDK5 is required for neurite outgrowth and cortical lamination. Activator of TPKII.	Cleavage of p35 to p25 may be involved in the pathogenesis of Alzheimer disease. The p25 form accumulates in neurons in the brain of patients with Alzheimer disease, but not in normal brain. This accumulation correlates with an increase in CDK5 kinase activity. Application of amyloid beta peptide A- beta(1-42) induced the conversion of p35 to p25 in primary cortical neurons. Expression of the p25…	Neurodegenerative disease
2elh_A_cavity_2	9	4.349	0.4832	5	2	2	0	0	0	Protein distal antenna	NONE	Q9VBW6	NONE	NONE	NONE
2qvv_A_cavity_1	7	4.244	0.6064	4	1	1	0	1	0	Fructose-1,6-bisphosphatase 1	NONE	P00636	Carbohydrate transport and metabolism	NONE	NONE
1rp8_A_cavity_1	8	4.244	0.5305	4	1	1	2	0	0	Alpha-amylase type A isozyme	NONE	P00693	Carbohydrate transport and metabolism	NONE	NONE
1a57_A_cavity_1	9	4.125	0.4583	5	1	1	2	0	0	Fatty acid-binding protein, intestinal	NONE	P02693	Involved in transporter activity	NONE	NONE
1pp2_L_cavity_1	8	4.107	0.5134	4	0	3	1	0	0	Phospholipase A2	NONE	P00624	NONE	NONE	NONE
1yfm_A_cavity_1	7	4.077	0.5824	2	2	1	1	1	0	Fumarate hydratase, mitochondrial	NONE	P08417	NONE	NONE	NONE
2hcb_B_cavity_2	7	4.053	0.579	4	0	2	0	1	0	Chromosomal replication initiator protein dnaA	NONE	O66659	Involved in nucleotide binding	NONE	NONE
2pof_A_cavity_1	9	4.053	0.4504	3	1	2	2	1	0	CDP-diacylglycerol pyrophosphatase	NONE	Q8X7A5	NONE	NONE	NONE
1f0n_A_cavity_1	9	4.035	0.4484	6	2	0	0	1	0	Antigen 85-B	NONE	P0C5B9	NONE	NONE	NONE
1pn0_B_cavity_2	8	4.024	0.503	1	2	2	2	1	0	Phenol 2-monooxygenase	NONE	P15245	Coenzyme transport and metabolism	NONE	NONE
1o68_A_cavity_1	9	3.995	0.4439	5	0	2	2	0	0	3-methyl-2-oxobutanoate hydroxymethyltransferase	NONE	Q9JZW6	Catalyzes the reversible reaction in which hydroxymethyl group from 5,10-methylenetetrahydrofolate is tranferred onto alpha-ketoisovalerate to form ketopantoate.	NONE	NONE
1u08_A_cavity_4	8	3.958	0.4947	3	2	2	1	0	0	Aminotransferase ybdL	NONE	P77806	NONE	NONE	NONE
1gk9_B_cavity_7	7	3.95	0.5642	4	1	1	0	1	0	Penicillin G acylase	NONE	P06875	NONE	NONE	NONE
2qtv_A_cavity_6	7	3.914	0.5592	3	1	1	0	2	0	Protein transport protein SEC23	NONE	P15303	NONE	NONE	NONE
1yiv_A_cavity_1	8	3.901	0.4877	4	2	0	2	0	0	Myelin P2 protein	NONE	P0C6G6	NONE	NONE	NONE
2in5_A_cavity_2	6	3.873	0.6455	2	0	2	0	2	0	Uncharacterized lipoprotein gfcB	NONE	P75884	NONE	NONE	NONE
1ygj_A_cavity_1	8	3.864	0.483	3	1	3	1	0	0	Pyridoxal kinase	NONE	P82197	NONE	NONE	NONE
1i9y_A_cavity_2	8	3.863	0.4829	1	2	2	2	1	0	Inositol-1,4,5-trisphosphate 5-phosphatase 1	NONE	O43001	Involved in inositol or phosphatidylinositol phosphatase activity	NONE	NONE
2f2l_X_cavity_1	8	3.852	0.4815	2	1	1	0	4	0	Peptidoglycan-recognition protein LC	NONE	Q9GNK5	NONE	NONE	NONE
1sr8_A_cavity_2	8	3.826	0.4782	4	2	1	1	0	0	Putative cobalt-precorrin-6A synthase [deacetylating]	NONE	O29535	NONE	NONE	NONE
2jun_A_cavity_1	6	3.814	0.6356	2	1	2	1	0	0	Midline-1	LIGASE	TRI18_HUMAN	May have E3 ubiquitin ligase activity which targets the catalytic subunit of protein phosphatase 2 for degradation.	Defects in MID1 are the cause of Opitz syndrome type I (OS-I) [MIM:300000]. OS-I is an X-linked recessive disorder characterized by hypertelorism, genital-urinary defects such as hypospadias in males and splayed labia in females, lip-palate- laryngotracheal clefts, imperforate anus, developmental delay and congenital heart defects. OS-I mutations produce proteins with a decreased affinity for mic…	NONE
2hps_A_cavity_1	8	3.809	0.4761	5	2	1	0	0	0	Luciferin-binding protein	NONE	P05938	NONE	NONE	NONE
1td9_B_cavity_2	7	3.787	0.541	1	2	2	2	0	0	Phosphate acetyltransferase	NONE	P39646	Energy production and conversion	NONE	NONE
2ewy_C_cavity_2	6	3.782	0.6303	2	1	2	1	0	0	Beta-secretase 2	HYDROLASE	BACE2_HUMAN	NONE	NONE	NONE
1pve_A_cavity_1	8	3.772	0.4716	2	2	3	1	0	0	UV excision repair protein RAD23 homolog B	NONE	P54727	NONE	NONE	NONE
1k3v_A_cavity_5	8	3.76	0.4699	2	1	2	3	0	0	Coat protein VP1	NONE	P18546	NONE	NONE	NONE
3hmq_A_cavity_3	8	3.757	0.4696	3	2	2	1	0	0	NH(3)-dependent NAD(+) synthetase	NONE	Q8ZPU5	NONE	NONE	NONE
2vwd_A_cavity_2	8	3.751	0.4689	4	1	2	0	1	0	Glycoprotein G	NONE	Q9IH62	NONE	NONE	NONE
2cvo_A_cavity_3	8	3.734	0.4668	4	3	1	0	0	0	Probable N-acetyl-gamma-glutamyl-phosphate reductase, chloroplastic	NONE	Q6AV34	NONE	NONE	NONE
2eec_A_cavity_1	8	3.733	0.4667	6	1	1	0	0	0	Filamin-B	NONE	O75369	NONE	NONE	NONE
2j47_A_cavity_1	7	3.731	0.533	3	1	1	0	2	0	O-GlcNAcase BT_4395	NONE	Q89ZI2	NONE	NONE	NONE
1t57_C_cavity_3	8	3.73	0.4662	2	2	3	0	1	0	Conserved protein	NONE	O27711	Involved in magnesium ion binding	NONE	NONE
1q2l_A_cavity_7	8	3.721	0.4652	3	2	2	1	0	0	Protease 3	NONE	P05458	NONE	NONE	NONE
3g07_D_cavity_1	8	3.718	0.4647	4	1	2	1	0	0	7SK snRNA methylphosphate capping enzyme	NONE	Q7L2J0	NONE	NONE	NONE
1vko_A_cavity_5	8	3.703	0.4628	4	2	2	0	0	0	Hypothetical protein	NONE	Q18664	Involved in inositol-3-phosphate synthase activity	NONE	NONE
2atx_B_cavity_1	6	3.699	0.6166	2	2	1	1	0	0	Rho-related GTP-binding protein RhoQ	NONE	P17081	NONE	NONE	NONE
1x5s_A_cavity_1	8	3.692	0.4615	2	1	2	2	1	0	Cold-inducible RNA-binding protein	NONE	Q14011	NONE	NONE	NONE
2bjh_B_cavity_2	7	3.681	0.5259	3	1	1	0	2	0	Feruloyl esterase A	NONE	O42807	NONE	NONE	NONE
1rly_A_cavity_1	8	3.67	0.4588	4	0	3	1	0	0	Transcription initiation factor IIB	NONE	Q00403	NONE	NONE	NONE
2pp4_A_cavity_1	8	3.658	0.4572	6	1	1	0	0	0	Protein CBFA2T1	TRANSCRIPTION	MTG8_HUMAN	Transcription regulator that excerts its function by binding to histone deacetylases and transcription factors. Can repress transactivation mediated by TCF12.	A chromosomal aberration involving RUNX1T1 is a cause of acute myeloid leukemia (AML-M2). Translocation t(8;21)(q22;q22) with RUNX1/AML1.;Defects in RUNX1T1 may be a cause of colorectal cancer (CRC) [MIM:114500].	NONE
1jv1_A_cavity_3	6	3.641	0.6068	3	1	1	1	0	0	UDP-N-acetylhexosamine pyrophosphorylase	NONE	Q16222	Involved in nucleotidyltransferase activity	NONE	NONE
3csk_A_cavity_4	6	3.632	0.6053	1	2	1	2	0	0	Probable dipeptidyl-peptidase 3	NONE	Q08225	NONE	NONE	NONE
2c96_A_cavity_1	8	3.625	0.4532	5	2	0	0	1	0	Psp operon transcriptional activator	NONE	P37344	NONE	NONE	NONE
2rh0_C_cavity_3	8	3.622	0.4527	5	1	2	0	0	0	NudC domain-containing protein 2	NONE	Q9CQ48	NONE	NONE	NONE
1aip_D_cavity_1	8	3.621	0.4527	4	2	1	1	0	0	Elongation factor Tu-A	NONE	P60338	NONE	NONE	NONE
2pff_A_cavity_8	6	3.617	0.6029	3	2	1	0	0	0	Fatty acid synthase subunit alpha	NONE	P19097	NONE	NONE	NONE
1s6d_A_cavity_1	8	3.615	0.4518	5	0	2	0	1	0	Albumin-8	NONE	P23110	NONE	NONE	NONE
1wxr_A_cavity_2	8	3.608	0.451	4	1	1	2	0	0	Hemoglobin-binding protease hbp	NONE	O88093	NONE	NONE	NONE
1s70_A_cavity_2	6	3.572	0.5954	2	2	1	0	1	0	Serine/threonine-protein phosphatase PP1-beta catalytic subunit	NONE	P62140	NONE	NONE	NONE
1in7_A_cavity_2	6	3.566	0.5943	2	3	0	0	1	0	Holliday junction ATP-dependent DNA helicase ruvB	NONE	Q56313	Involved in nucleotide binding	NONE	NONE
2vz6_A_cavity_1	8	3.558	0.4448	5	2	0	1	0	0	Calcium/calmodulin-dependent protein kinase type II alpha chain	TRANSFERASE	KCC2A_HUMAN	CaM-kinase II (CAMK2) is a prominent kinase in the central nervous system that may function in long-term potentiation and neurotransmitter release. Member of the NMDAR signaling complex in excitatory synapses it may regulate NMDAR-dependent potentiation o	NONE	NONE
1l6s_A_cavity_1	6	3.529	0.5881	2	2	1	1	0	0	Delta-aminolevulinic acid dehydratase	NONE	P0ACB2	Coenzyme transport and metabolism	NONE	NONE
1t9g_S_cavity_1	7	3.525	0.5036	3	0	2	1	1	0	Medium-chain specific acyl-CoA dehydrogenase, mitochondrial	OXIDOREDUCTASE, ELECTRON TRANSPORT	ACADM_HUMAN	This enzyme is specific for acyl chain lengths of 4 to 16.	Defects in ACADM are the cause of medium-chain acyl-CoA dehydrogenase deficiency (MCAD deficiency) [MIM:201450]. It is an autosomal recessive disease which causes fasting hypoglycemia, hepatic dysfunction, and encephalopathy, often resulting in death in infancy. The disease frequency is one in 13000.	NONE
2vwe_L_cavity_2	7	3.52	0.5029	3	0	2	2	0	0	Vascular endothelial growth factor B	NONE	P49765	NONE	NONE	NONE
2zbn_A_cavity_1	7	3.497	0.4996	4	0	2	0	1	0	UPF0310 protein PH1033	NONE	O58764	NONE	NONE	NONE
1lxm_A_cavity_5	7	3.492	0.4988	0	1	3	1	2	0	Hyaluronate lyase	NONE	Q53591	Involved in hyaluronidase activity	NONE	NONE
2ve7_C_cavity_1	7	3.472	0.496	5	1	1	0	0	0	Kinetochore protein NDC80 homolog	NONE	O14777	NONE	NONE	NONE
3ei5_A_cavity_1	7	3.46	0.4943	3	1	2	1	0	0	LL-diaminopimelate aminotransferase, chloroplastic	NONE	Q93ZN9	NONE	NONE	NONE
2ffa_A_cavity_1	7	3.436	0.4908	4	0	2	1	0	0	Alpha-hemolysin translocation ATP-binding protein hlyB	NONE	P08716	NONE	NONE	NONE
1e77_A_cavity_3	7	3.396	0.4851	5	1	1	0	0	0	Glucose-6-phosphate 1-dehydrogenase	NONE	P11411	Carbohydrate transport and metabolism	NONE	NONE
2e29_A_cavity_1	6	3.392	0.5654	4	0	2	0	0	0	ATP-dependent RNA helicase DDX50	NONE	Q9BQ39	NONE	NONE	NONE
1vrn_C_cavity_2	7	3.392	0.4846	2	1	3	1	0	0	Photosynthetic reaction center cytochrome c subunit	NONE	P07173	NONE	NONE	NONE
1un8_A_cavity_4	7	3.392	0.4846	3	0	2	2	0	0	Dihydroxyacetone kinase	NONE	P45510	Carbohydrate transport and metabolism	NONE	NONE
3ed1_C_cavity_1	7	3.392	0.4845	3	0	2	2	0	0	Gibberellin receptor GID1	NONE	Q6L545	NONE	NONE	NONE
3fqd_A_cavity_8	5	3.39	0.6781	3	1	0	0	1	0	5-3 exoribonuclease 2	NONE	P40848	NONE	NONE	NONE
1fwi_C_cavity_2	6	3.381	0.5634	3	0	2	1	0	0	Urease subunit gamma	NONE	P18316	NONE	NONE	NONE
3bkb_A_cavity_3	6	3.377	0.5628	3	2	0	0	1	0	Proto-oncogene tyrosine-protein kinase Fes/Fps	TRANSFERASE	FES_HUMAN	NONE	NONE	NONE
2e55_B_cavity_1	6	3.366	0.561	1	2	2	1	0	0	Uracil phosphoribosyltransferase	NONE	O67914	NONE	NONE	NONE
1fiz_A_cavity_4	6	3.364	0.5606	3	2	0	1	0	0	Acrosin	NONE	P08001	NONE	NONE	NONE
1vbg_A_cavity_4	6	3.364	0.5606	3	1	1	0	1	0	Pyruvate, phosphate dikinase 1, chloroplastic	NONE	P11155	Carbohydrate transport and metabolism	NONE	NONE
1dw3_C_cavity_1	7	3.364	0.4806	5	1	1	0	0	0	Cytochrome c-type protein SHP	NONE	P81238	Involved in iron ion binding	NONE	NONE
1uf2_E_cavity_2	7	3.363	0.4804	4	1	1	1	0	0	Major 114 kDa structural protein	NONE	P22472	NONE	NONE	NONE
2g67_A_cavity_3	6	3.359	0.5599	2	1	2	1	0	0	Pyruvate dehydrogenase E1 component	NONE	P0AFG8	Energy production and conversion	NONE	NONE
2v62_B_cavity_4	6	3.359	0.5598	2	1	2	1	0	0	Serine/threonine-protein kinase VRK2	TRANSFERASE	VRK2_HUMAN	Probable serine/threonine kinase (By similarity).	NONE	NONE
1f0x_A_cavity_3	7	3.359	0.4799	4	1	1	0	1	0	D-lactate dehydrogenase	OXIDOREDUCTASE	DLD_ECOLI	First component of the membrane-bound D-lactate oxidase, which is believed to play an important role in the energization of the active transport of a variety of sugars and amino acids.	NONE	NONE
1ynt_G_cavity_1	7	3.335	0.4764	2	1	2	2	0	0	Major surface antigen p30	NONE	P13664	NONE	NONE	NONE
2gv0_A_cavity_1	6	3.333	0.5555	2	1	1	2	0	0	Lysozyme C	NONE	Q7LZQ1	NONE	NONE	NONE
2goy_G_cavity_1	7	3.33	0.4758	5	2	0	0	0	0	Phosphoadenosine phosphosulfate reductase	NONE	O05927	NONE	NONE	NONE
3fz7_F_cavity_2	7	3.328	0.4754	5	0	1	1	0	0	Glutamate decarboxylase beta	NONE	P69910	NONE	NONE	NONE
1u4j_A_cavity_1	7	3.323	0.4747	4	1	1	1	0	0	Phospholipase A2 isoform 2	NONE	Q6SLM1	Involved in phospholipase A2 activity	NONE	NONE
2i3q_A_cavity_1	7	3.319	0.4741	3	1	1	0	2	0	DNA endonuclease I-CreI	NONE	P05725	NONE	NONE	NONE
1fxk_A_cavity_1	6	3.315	0.5525	3	2	1	0	0	0	Prefoldin subunit beta	NONE	O26774	NONE	NONE	NONE
1smq_C_cavity_2	6	3.303	0.5505	2	2	1	1	0	0	Ribonucleoside-diphosphate reductase small chain 1	NONE	P09938	NONE	NONE	NONE
2ex8_A_cavity_3	6	3.299	0.5499	3	2	0	0	1	0	D-alanyl-D-alanine carboxypeptidase dacB	NONE	P24228	NONE	NONE	NONE
1vmi_A_cavity_2	7	3.294	0.4706	4	1	1	0	1	0	Ethanolamine utilization protein eutD	NONE	P77218	NONE	NONE	NONE
1ukf_A_cavity_1	6	3.293	0.5488	4	1	0	0	1	0	Cysteine protease avirulence protein avrPphB	NONE	Q52430	NONE	NONE	NONE
1l7b_A_cavity_1	7	3.287	0.4695	5	0	1	1	0	0	DNA ligase	NONE	P26996	NONE	NONE	NONE
1puj_A_cavity_1	6	3.281	0.5469	3	1	1	0	1	0	Ribosome biogenesis GTPase A	NONE	O31743	NONE	NONE	NONE
1ude_C_cavity_1	6	3.274	0.5457	2	0	2	2	0	0	Inorganic pyrophosphatase	NONE	O59570	NONE	NONE	NONE
1fg7_A_cavity_1	6	3.271	0.5451	2	2	2	0	0	0	Histidinol-phosphate aminotransferase	NONE	P06986	Amino acid transport and metabolism	NONE	NONE
2k0s_A_cavity_2	7	3.27	0.4671	2	1	2	2	0	0	ADP-ribosylation factor-like protein 2-binding protein	NONE	Q7SYL1	NONE	NONE	NONE
1ow1_A_cavity_1	6	3.268	0.5446	3	0	2	0	1	0	Msx2-interacting protein	NONE	Q96T58	NONE	NONE	NONE
1v0f_A_cavity_8	7	3.268	0.4668	0	3	1	1	2	0	Endo-N-acetylneuraminidase	NONE	Q04830	Involved in endo-alpha-sialidase activity	NONE	NONE
1mzd_A_cavity_1	7	3.266	0.4666	2	1	3	1	0	0	Granzyme K	HYDROLASE	GRAK_HUMAN	NONE	NONE	NONE
1yaf_B_cavity_2	7	3.264	0.4663	4	1	1	1	0	0	Thiaminase-2	NONE	P25052	Transcription	NONE	NONE
2j7q_A_cavity_2	6	3.253	0.5422	2	3	1	0	0	0	Ubiquitin	NONE	P62988	NONE	NONE	NONE
1ypf_B_cavity_2	5	3.25	0.6499	3	1	0	0	1	0	GMP reductase	NONE	Q81JJ9	NONE	NONE	NONE
1xup_O_cavity_3	7	3.246	0.4637	4	1	1	0	1	0	Glycerol kinase	NONE	O34153	NONE	NONE	NONE
1asq_A_cavity_2	6	3.242	0.5403	4	1	1	0	0	0	L-ascorbate oxidase	NONE	P37064	NONE	NONE	NONE
2gfq_A_cavity_2	5	3.24	0.648	3	0	1	0	1	0	D-tyrosyl-tRNA(Tyr) deacylase	NONE	O57774	NONE	NONE	NONE
1bmv_2_cavity_4	5	3.24	0.648	2	1	1	1	0	0	RNA2 polyprotein	NONE	P23009	NONE	NONE	NONE
1b25_B_cavity_2	6	3.238	0.5397	3	1	0	0	2	0	Formaldehyde ferredoxin oxidoreductase	NONE	O93738	Involved in oxidoreductase activity, acting on the aldehyde or oxo group of donors, iron-sulfur protein as acceptor	NONE	NONE
1wi3_A_cavity_2	7	3.237	0.4625	4	1	1	0	1	0	DNA-binding protein SATB2	DNA BINDING PROTEIN	SATB2_HUMAN	May play an important role in palate formation.	Chromosomal aberrations involving SATB2 are found in isolated cleft palate. Translocation t(2;7); translocation t(2;11).;Defects in SATB2 are the cause of isolated cleft palate with mental retardation [MIM:119540]. Patients manifest cleft palate, craniofacial dysmorphism and profound mental retardation.	NONE
1hm6_B_cavity_3	5	3.236	0.6472	2	1	1	1	0	0	Annexin A1	NONE	P19619	NONE	NONE	NONE
1oyz_A_cavity_2	6	3.231	0.5384	2	2	1	1	0	0	Protein yibA	NONE	P0ADK7	NONE	NONE	NONE
1k07_A_cavity_1	6	3.23	0.5383	3	1	1	0	1	0	FEZ-1 protein	NONE	Q9K578	Involved in hydrolase activity	NONE	NONE
2yu4_A_cavity_1	6	3.225	0.5375	2	1	1	1	1	0	E3 SUMO-protein ligase NSE2	NONE	Q96MF7	NONE	NONE	NONE
2f3i_A_cavity_1	6	3.224	0.5374	3	1	1	1	0	0	DNA-directed RNA polymerases I, II, and III subunit RPABC3	NONE	P52434	NONE	NONE	NONE
1j7x_A_cavity_3	7	3.221	0.4602	4	1	1	1	0	0	Retinol-binding protein 3	NONE	Q7SZI7	NONE	NONE	NONE
2dfn_A_cavity_1	7	3.221	0.4602	2	1	1	2	1	0	Shikimate kinase	NONE	P0A4Z2	Involved in shikimate kinase activity	NONE	NONE
2q01_C_cavity_2	6	3.218	0.5364	2	0	2	1	1	0	Uronate isomerase	NONE	Q9A874	NONE	NONE	NONE
1k1d_A_cavity_2	7	3.217	0.4596	3	1	1	1	1	0	D-hydantoinase	NONE	Q45515	Nucleotide transport and metabolism	NONE	NONE
2jgd_A_cavity_8	7	3.211	0.4587	4	0	2	0	1	0	2-oxoglutarate dehydrogenase E1 component	NONE	P0AFG3	NONE	NONE	NONE
1w36_F_cavity_9	6	3.209	0.5348	3	1	1	1	0	0	Exodeoxyribonuclease V gamma chain	NONE	P07648	NONE	NONE	NONE
1kz4_C_cavity_1	5	3.208	0.6417	2	1	1	0	1	0	6,7-dimethyl-8-ribityllumazine synthase	NONE	Q9UUB1	Coenzyme transport and metabolism	NONE	For the treatment of ariboflavinosis (vitamin B2 deficiency).
2vas_A_cavity_5	7	3.205	0.4579	4	1	1	0	1	0	Myosin-VI	NONE	Q29122	NONE	NONE	NONE
2yw2_A_cavity_3	7	3.199	0.4569	3	0	2	1	1	0	Phosphoribosylamine--glycine ligase	NONE	O66949	NONE	NONE	NONE
1cpc_B_cavity_1	5	3.197	0.6394	3	1	0	1	0	0	C-phycocyanin-1 alpha chain	NONE	P07122	NONE	NONE	NONE
3g3o_A_cavity_3	6	3.194	0.5323	4	1	1	0	0	0	Vacuolar transporter chaperone 2	NONE	P43585	NONE	NONE	NONE
1amy_A_cavity_1	7	3.194	0.4563	4	0	2	1	0	0	Alpha-amylase type B isozyme	NONE	P04063	Carbohydrate transport and metabolism	NONE	NONE
2vyc_I_cavity_5	7	3.194	0.4563	3	1	2	0	1	0	Biodegradative arginine decarboxylase	NONE	P28629	NONE	NONE	NONE
1lwu_E_cavity_2	6	3.187	0.5311	3	1	1	1	0	0	Fibrinogen alpha-1 chain	NONE	P02674	NONE	NONE	NONE
2eql_A_cavity_1	7	3.184	0.4548	3	1	2	1	0	0	Lysozyme C, milk isozyme	NONE	P11376	NONE	NONE	NONE
1zz3_A_cavity_2	7	3.183	0.4548	3	1	1	0	2	0	Histone deacetylase-like amidohydrolase	NONE	Q70I53	NONE	NONE	NONE
1aj8_A_cavity_2	7	3.182	0.4545	5	1	1	0	0	0	Citrate synthase	NONE	Q53554	Involved in transferase activity, transferring acyl groups, acyl groups converted into alkyl on transfer	NONE	NONE
2b61_A_cavity_3	6	3.179	0.5298	2	2	1	1	0	0	Homoserine O-acetyltransferase	NONE	P45131	NONE	NONE	NONE
1is2_B_cavity_2	6	3.174	0.5291	3	2	1	0	0	0	Acyl-coenzyme A oxidase 1, peroxisomal	NONE	P07872	Involved in acyl-CoA oxidase activity	NONE	NONE
1nj6_A_cavity_6	7	3.172	0.4532	3	0	3	1	0	0	Prolyl-tRNA synthetase	NONE	O26708	Translation, ribosomal structure and biogenesis	NONE	NONE
3beh_A_cavity_3	7	3.159	0.4514	3	1	2	0	1	0	Cyclic nucleotide-gated potassium channel mll3241	NONE	Q98GN8	Involved in cAMP-dependent protein kinase regulator activity	NONE	NONE
1ahj_F_cavity_3	5	3.158	0.6317	2	1	1	1	0	0	Nitrile hydratase subunit alpha	NONE	P13448	NONE	NONE	NONE
1pwh_A_cavity_1	5	3.157	0.6314	2	1	1	0	1	0	L-serine dehydratase/L-threonine deaminase	NONE	P09367	NONE	NONE	NONE
3b68_A_cavity_1	7	3.155	0.4507	5	0	1	0	1	0	Androgen receptor	TRANSCRIPTION	ANDR_HUMAN	Steroid hormone receptors are ligand-activated transcription factors that regulate eukaryotic gene expression and affect cellular proliferation and differentiation in target tissues. Transcription factor activity is modulated by bound coactivator and core	Genetic variation in AR can be responsible of androgenetic alopecia (AGA) [MIM:109200].;Defects in AR are the cause of androgen insensibility syndrome (AIS) [MIM:300068]; previously known as testicular feminization syndrome (TFM). It can be complete (CAIS) when external genitalia are phenotypically female; or partial (PAIS) when external genitalia are substantively ambiguous or mild (MAIS) when e…	Hypoactive sexual desire disorder;Hepatitis B virus infection;Cardiac failure;Andrology;Hirsutism;Female sexual dysfunction;Psoriasis;Reperfusion injury;Plasmodium infection;Atherosclerosis;Prostate hyperplasia;Fatigue;Male sexual dysfunction;Autoimmune disease;Testosterone deficiency;Uterine fibroids;Metabolic disorder;Myalgia;Obesity;Gynecological disorder;Contraception;Cancer;Hypercholesterole…
2dqn_A_cavity_1	7	3.151	0.4501	2	2	2	0	1	0	Glutamyl-tRNA(Gln) amidotransferase subunit A	NONE	P63488	NONE	NONE	NONE
3c7g_A_cavity_5	6	3.15	0.5251	3	2	0	1	0	0	Arabinoxylan arabinofuranohydrolase	NONE	Q45071	NONE	NONE	NONE
3cww_A_cavity_9	7	3.147	0.4495	2	1	2	1	1	0	Insulin-degrading enzyme	NONE	P14735	NONE	NONE	NONE
2poc_B_cavity_2	7	3.146	0.4494	3	1	1	0	2	0	Glucosamine--fructose-6-phosphate aminotransferase [isomerizing]	NONE	P53704	NONE	NONE	NONE
1eke_A_cavity_1	7	3.144	0.4492	2	1	2	2	0	0	Ribonuclease HII	HYDROLASE	RNH2_METJA	Endonuclease that specifically degrades the RNA of RNA- DNA hybrids.	NONE	NONE
2d86_A_cavity_1	7	3.142	0.4489	4	1	1	1	0	0	Guanine nucleotide exchange factor VAV3	NONE	Q9UKW4	NONE	NONE	NONE
3gri_B_cavity_1	5	3.139	0.6279	2	1	1	1	0	0	Dihydroorotase	NONE	P65907	NONE	NONE	NONE
1wh0_A_cavity_1	6	3.131	0.5218	4	0	1	0	1	0	Ubiquitin carboxyl-terminal hydrolase 19	HYDROLASE	UBP19_HUMAN	Involved in the ubiquitin-dependent proteolytic pathway in conjunction with the 26S proteasome (By similarity).	NONE	NONE
2ka5_A_cavity_1	6	3.131	0.5218	4	0	1	0	1	0	Putative anti-sigma factor antagonist TM_1081	NONE	Q9X0H0	NONE	NONE	NONE
3cw0_A_cavity_1	6	3.128	0.5213	2	0	2	1	1	0	Twin-arginine leader-binding protein dmsD	NONE	P69853	NONE	NONE	NONE
2j4k_A_cavity_3	5	3.121	0.6241	2	1	1	1	0	0	Uridylate kinase	NONE	Q97ZE2	NONE	NONE	NONE
2iae_B_cavity_2	6	3.116	0.5193	2	1	1	2	0	0	Serine/threonine-protein phosphatase 2A 65 kDa regulatory subunit A alpha isoform	NONE	Q76MZ3	NONE	NONE	NONE
1qwo_A_cavity_3	6	3.109	0.5181	3	2	0	0	1	0	3-phytase A	NONE	O00092	NONE	NONE	NONE
1l3g_A_cavity_1	6	3.108	0.5181	3	2	0	0	1	0	Transcription factor MBP1	NONE	P39678	NONE	NONE	NONE
2kg4_A_cavity_2	5	3.107	0.6214	2	1	1	0	1	0	Growth arrest and DNA-damage-inducible protein GADD45 alpha	NONE	P24522	NONE	NONE	NONE
2f6d_A_cavity_1	6	3.104	0.5173	3	0	2	1	0	0	Glucoamylase GLU1	NONE	P08017	NONE	NONE	NONE
1ooe_B_cavity_2	5	3.099	0.6197	2	0	2	1	0	0	Hypothetical protein qdpr-1	NONE	Q9XVJ3	Involved in oxidoreductase activity	NONE	NONE
2pa6_A_cavity_4	6	3.096	0.5161	1	3	0	2	0	0	Enolase	NONE	Q60173	NONE	NONE	NONE
1x6a_A_cavity_1	6	3.094	0.5156	3	0	2	0	1	0	LIM domain kinase 2	PROTEIN BINDING	LIMK2_HUMAN	Displays serine/threonine-specific phosphorylation of myelin basic protein and histone (MBP) in vitro.	NONE	NONE
2e7u_A_cavity_2	5	3.075	0.6149	4	1	0	0	0	0	Glutamate-1-semialdehyde 2,1-aminomutase	NONE	Q5SJS4	NONE	NONE	NONE
1z9f_A_cavity_1	6	3.075	0.5126	3	1	1	1	0	0	Single-stranded DNA-binding protein	NONE	Q9WZ73	NONE	NONE	NONE
2rfa_A_cavity_1	6	3.075	0.5125	5	1	0	0	0	0	Transient receptor potential cation channel subfamily V member 6	NONE	Q91WD2	NONE	NONE	NONE
1l9x_C_cavity_3	6	3.071	0.5119	2	2	1	0	1	0	Gamma-glutamyl hydrolase	NONE	Q92820	Involved in gamma-gluatmyl hydrolase activity	NONE	Considered to be natures Brain food by improving mental capacities; helps speed the healing of ulcers; gives a lift from fatigue; helps control alcoholism, schizophrenia and the craving for sugar.
5ldh_B_cavity_1	6	3.071	0.5118	3	2	1	0	0	0	L-lactate dehydrogenase B chain	NONE	P00336	NONE	NONE	NONE
1ce8_F_cavity_2	6	3.068	0.5113	2	0	2	1	1	0	Carbamoyl-phosphate synthase large chain	NONE	P00968	NONE	NONE	NONE
2miz_A_cavity_1	4	3.061	0.7652	3	1	0	0	0	0	NONE	NONE	NONE	NONE	NONE	NONE
1p4t_A_cavity_2	6	3.04	0.5067	5	1	0	0	0	0	Surface protein A	NONE	Q9RP17	Involved in porin activity	NONE	NONE
1f5x_A_cavity_1	6	3.037	0.5062	2	1	2	1	0	0	Proto-oncogene vav	NONE	P27870	NONE	NONE	NONE
2rmr_A_cavity_1	6	3.028	0.5047	5	1	0	0	0	0	Paired amphipathic helix protein Sin3a	NONE	Q60520	NONE	NONE	NONE
1r76_A_cavity_6	6	3.027	0.5046	3	0	2	1	0	0	Pectate lyase	NONE	Q9X592	NONE	NONE	NONE
3bky_H_cavity_1	6	3.027	0.5045	3	0	1	0	2	0	B-lymphocyte antigen CD20	NONE	P11836	NONE	NONE	NONE
1veg_A_cavity_2	6	3.027	0.5044	3	2	1	0	0	0	NEDD8 ultimate buster 1	NONE	P54729	NONE	NONE	NONE
1qzg_A_cavity_1	6	3.023	0.5038	3	3	0	0	0	0	Protection of telomeres protein 1	NONE	O13988	NONE	NONE	NONE
3ckm_A_cavity_3	6	3.021	0.5035	3	0	2	1	0	0	Uncharacterized protein HI1655	NONE	P45299	NONE	NONE	NONE
1lrw_C_cavity_2	6	3.02	0.5033	2	2	0	2	0	0	Methanol dehydrogenase subunit 1	NONE	P12293	NONE	NONE	NONE
2c9o_B_cavity_2	6	3.02	0.5033	3	1	2	0	0	0	RuvB-like 1	NONE	Q9Y265	NONE	NONE	NONE
1s40_A_cavity_2	6	3.016	0.5026	4	1	0	0	1	0	Cell division control protein 13	NONE	P32797	NONE	NONE	NONE
1ncj_A_cavity_1	4	3.015	0.7537	3	0	1	0	0	0	Cadherin-2	NONE	P15116	NONE	NONE	NONE
2hhk_M_cavity_4	5	3.013	0.6027	4	1	0	0	0	0	Reaction center protein H chain	NONE	P0C0Y7	NONE	NONE	NONE
2fy4_A_cavity_3	6	3.013	0.5021	4	1	1	0	0	0	Choline O-acetyltransferase	NONE	P28329	NONE	NONE	NONE
1qcb_F_cavity_1	6	3.012	0.502	5	1	0	0	0	0	Heat-labile enterotoxin IIB, B chain	NONE	P43529	NONE	NONE	NONE
1b4f_F_cavity_1	6	3.012	0.502	4	2	0	0	0	0	Ephrin type-B receptor 2	SIGNAL TRANSDUCTION	EPHB2_HUMAN	Receptor for members of the ephrin-B family. Acts as a tumor suppressor.	Defects in EPHB2 are involved in the progression of prostate cancer [MIM:176807].;Defects in EPHB2 are involved in the development of prostate cancer metastasis to the brain [MIM:603688].	Ocular disease;Angiogenesis disorder;Cancer
1x65_A_cavity_1	6	3.011	0.5019	4	1	0	0	1	0	Cold shock domain-containing protein E1	NONE	O75534	NONE	NONE	NONE
1uwa_E_cavity_3	6	3.011	0.5018	3	1	1	1	0	0	Ribulose bisphosphate carboxylase large chain	NONE	P00877	NONE	NONE	NONE
1so0_C_cavity_2	5	3.006	0.6011	3	0	1	0	1	0	Aldose 1-epimerase	NONE	Q96C23	NONE	NONE	NONE
1j3x_A_cavity_1	6	3.002	0.5003	3	1	1	1	0	0	High mobility group protein B2	NONE	P17741	NONE	NONE	NONE
1win_A_cavity_1	5	3	0.6	3	1	0	1	0	0	Flotillin-2	NONE	Q60634	NONE	NONE	NONE
1hm9_A_cavity_4	5	2.997	0.5994	3	1	0	1	0	0	Bifunctional protein glmU	NONE	Q97R46	Involved in UDP-N-acetylglucosamine diphosphorylase activity	NONE	NONE
1spi_B_cavity_1	6	2.997	0.4994	4	0	2	0	0	0	Fructose-1,6-bisphosphatase, chloroplastic	NONE	P22418	NONE	NONE	NONE
2aq0_A_cavity_1	4	2.995	0.7487	3	0	1	0	0	0	DNA repair endonuclease XPF	DNA REPAIR, HYDROLASE	XPF_HUMAN	Structure-specific DNA repair endonuclease responsible for the 5-prime incision during DNA repair. Involved in homologous recombination that assists in removing interstrand cross-link.	Defects in ERCC4 are the cause of xeroderma pigmentosum complementation group F (XP-F) [MIM:278760]; also known as xeroderma pigmentosum VI (XP6). XP-F is an autosomal recessive disease characterized by hypersensitivity of the skin to sunlight followed by high incidence of skin cancer and frequent neurologic abnormalities.;Defects in ERCC4 are a cause of XFE progeroid syndrome [MIM:610965]. This …	NONE
3gyr_C_cavity_3	6	2.995	0.4992	1	1	2	0	2	0	Phenoxazinone synthase	NONE	Q53692	NONE	NONE	NONE
2j91_B_cavity_4	6	2.994	0.4991	3	0	2	1	0	0	Adenylosuccinate lyase	NONE	P30566	NONE	NONE	NONE
1x86_A_cavity_2	6	2.994	0.4989	3	2	1	0	0	0	Rho guanine nucleotide exchange factor 12	SIGNALING PROTEIN/MEMBRANE PROTEIN	ARHGC_HUMAN	May play a role in the regulation of RhoA GTPase by guanine nucleotide-binding alpha-12 (GNA12) and alpha-13 (GNA13). Acts as guanine nucleotide exchange factor (GEF) for RhoA GTPase and may act as GTPase-activating protein (GAP) for GNA12 and GNA13.	A chromosomal aberration involving ARHGEF12 may be a cause of acute leukemia. Translocation t(11;11)(q23;23) with MLL.	NONE
2p2g_C_cavity_1	4	2.993	0.7483	3	0	1	0	0	0	Ornithine carbamoyltransferase	NONE	P0A5M8	NONE	NONE	NONE
2gsq_A_cavity_1	6	2.992	0.4987	5	0	1	0	0	0	Glutathione S-transferase	NONE	P46088	Involved in glutathione transferase activity	NONE	NONE
1b71_A_cavity_1	6	2.992	0.4986	2	1	1	2	0	0	Rubrerythrin	NONE	P24931	NONE	NONE	NONE
2nq5_A_cavity_5	5	2.991	0.5982	4	1	0	0	0	0	5-methyltetrahydropteroyltriglutamate--homocysteine methyltransferase	NONE	Q8CWX6	NONE	NONE	NONE
2d2z_C_cavity_1	6	2.991	0.4984	3	1	1	1	0	0	Chloride intracellular channel protein 4	NONE	Q9Y696	NONE	NONE	NONE
1ibv_B_cavity_2	6	2.99	0.4984	2	0	2	2	0	0	Histidine decarboxylase proenzyme	NONE	P00862	NONE	NONE	NONE
2p0c_B_cavity_2	4	2.989	0.7472	2	1	1	0	0	0	Proto-oncogene tyrosine-protein kinase MER	NONE	Q12866	NONE	NONE	NONE
1og4_A_cavity_1	6	2.989	0.4982	3	2	1	0	0	0	T-cell ecto-ADP-ribosyltransferase 2	NONE	P20974	Involved in NAD(P)+-protein-arginine ADP-ribosyltransferase activity	NONE	NONE
2raj_A_cavity_3	6	2.989	0.4981	2	1	1	2	0	0	Sorting nexin-9	NONE	Q9Y5X1	NONE	NONE	NONE
1pc8_B_cavity_2	4	2.987	0.7469	3	1	0	0	0	0	Beta-galactoside-specific lectin 4	NONE	Q6ITZ3	NONE	NONE	NONE
1q1n_A_cavity_3	6	2.987	0.4979	3	1	2	0	0	0	NADP-dependent alcohol dehydrogenase 6	NONE	Q04894	Involved in zinc ion binding	NONE	NONE
1chm_A_cavity_1	6	2.987	0.4978	2	1	1	1	1	0	Creatinase	NONE	P38488	NONE	NONE	NONE
2ppq_A_cavity_3	5	2.986	0.5971	2	1	2	0	0	0	Homoserine kinase	NONE	Q8UHA8	NONE	NONE	NONE
2g2r_B_cavity_1	6	2.986	0.4977	5	0	1	0	0	0	Ig heavy chain Mem5	NONE	P84751	NONE	NONE	NONE
2csw_A_cavity_1	6	2.986	0.4976	3	2	1	0	0	0	E3 ubiquitin-protein ligase RNF8	NONE	O76064	NONE	NONE	NONE
1me7_A_cavity_5	5	2.985	0.5971	3	1	1	0	0	0	Inosine-5-monophosphate dehydrogenase	NONE	P50097	Nucleotide transport and metabolism	NONE	For the prophylaxis of organ rejection in patients receiving allogeneic renal transplants, administered in combination with cyclosporine and corticosteroids.
1d5m_C_cavity_2	5	2.985	0.597	2	1	1	0	1	0	HLA class II histocompatibility antigen, DRB1-4 beta chain	IMMUNE SYSTEM	2B14_HUMAN	NONE	NONE	NONE
3gvi_D_cavity_1	5	2.984	0.5968	4	1	0	0	0	0	Malate dehydrogenase	NONE	Q2YLR9	NONE	NONE	NONE
3cb5_A_cavity_5	6	2.984	0.4973	4	1	1	0	0	0	FACT complex subunit spt16	NONE	O94267	NONE	NONE	NONE
2zc6_B_cavity_2	6	2.984	0.4973	5	0	1	0	0	0	Penicillin-binding protein 1A	NONE	Q04707	NONE	NONE	NONE
2fhe_B_cavity_1	6	2.984	0.4973	4	0	2	0	0	0	Glutathione S-transferase class-mu 26 kDa isozyme 1	NONE	P56598	NONE	NONE	NONE
2h60_A_cavity_3	5	2.983	0.5965	3	1	1	0	0	0	Probable global transcription activator SNF2L4	NONE	P51532	NONE	NONE	NONE
1flc_A_cavity_2	5	2.981	0.5962	2	1	2	0	0	0	Hemagglutinin-esterase-fusion glycoprotein	NONE	P07975	NONE	NONE	NONE
1yvg_A_cavity_1	5	2.981	0.5961	4	1	0	0	0	0	Tetanus toxin	NONE	P04958	NONE	NONE	NONE
1u6g_B_cavity_1	6	2.981	0.4969	4	0	1	1	0	0	Cullin-1	NONE	Q13616	NONE	NONE	NONE
3gwj_A_cavity_2	4	2.98	0.7451	2	1	1	0	0	0	Arylphorin	NONE	Q7Z1F8	NONE	NONE	NONE
2i7t_A_cavity_3	4	2.98	0.7449	2	2	0	0	0	0	Cleavage and polyadenylation specificity factor subunit 3	HYDROLASE, RNA BINDING PROTEIN	CPSF3_HUMAN	Component of the cleavage and polyadenylation specificity factor (CPSF) complex that play a key role in pre-mRNA 3-end formation, recognizing the AAUAAA signal sequence and interacting with poly(A) polymerase and other factors to bring about cleavage and	NONE	NONE
1vcp_C_cavity_1	5	2.98	0.5959	3	2	0	0	0	0	Structural polyprotein	NONE	P03315	Involved in structural molecule activity	NONE	NONE
3ee7_D_cavity_1	6	2.98	0.4967	3	2	1	0	0	0	Replicase polyprotein 1a	NONE	P0C6U8	NONE	NONE	NONE
2rfo_B_cavity_2	6	2.98	0.4966	3	1	2	0	0	0	Nucleoporin NIC96	NONE	P34077	NONE	NONE	NONE
1gz6_D_cavity_3	5	2.978	0.5956	2	2	1	0	0	0	Peroxisomal multifunctional enzyme type 2	NONE	P97852	NONE	NONE	NONE
1mvh_A_cavity_1	6	2.978	0.4963	3	1	2	0	0	0	Histone-lysine N-methyltransferase, H3 lysine-9 specific	NONE	O60016	NONE	NONE	NONE
2bed_A_cavity_1	6	2.977	0.4962	3	2	1	0	0	0	Protein farnesyltransferase/geranylgeranyltransferase type-1 subunit alpha	NONE	Q04631	NONE	NONE	NONE
1yt5_C_cavity_2	6	2.976	0.4961	2	1	1	2	0	0	Probable inorganic polyphosphate/ATP-NAD kinase	NONE	Q9X255	NONE	NONE	NONE
2f4m_A_cavity_3	6	2.976	0.4959	2	2	1	0	1	0	Peptide-N(4)-(N-acetyl-beta-glucosaminyl)asparagine amidase	NONE	Q9JI78	NONE	NONE	NONE
2oca_A_cavity_4	6	2.975	0.4958	3	1	1	0	1	0	ATP-dependent DNA helicase uvsW	NONE	P20703	NONE	NONE	NONE
2ke3_A_cavity_2	5	2.974	0.5947	2	1	1	1	0	0	Neuroendocrine convertase 1	NONE	P63239	NONE	NONE	NONE
3boa_A_cavity_7	5	2.973	0.5946	3	0	1	1	0	0	Protein disulfide-isomerase	NONE	P17967	NONE	NONE	NONE
2d3l_A_cavity_2	5	2.972	0.5943	2	2	1	0	0	0	Glucan 1,4-alpha-maltohexaosidase	NONE	P19571	Carbohydrate transport and metabolism	NONE	NONE
1nec_A_cavity_2	6	2.972	0.4953	3	2	1	0	0	0	Oxygen-insensitive NAD(P)H nitroreductase	NONE	Q01234	Involved in oxidoreductase activity	NONE	NONE
2r7x_B_cavity_9	6	2.972	0.4953	3	1	2	0	0	0	RNA-directed RNA polymerase	NONE	O37061	NONE	NONE	NONE
1lk3_I_cavity_2	6	2.972	0.4953	3	1	2	0	0	0	Interleukin-10	IMMUNE SYSTEM	IL10_HUMAN	Inhibits the synthesis of a number of cytokines, including IFN-gamma, IL-2, IL-3, TNF and GM-CSF produced by activated macrophages and by helper T-cells.	Defects in IL10 are a cause of susceptibility to Crohn disease (CD) [MIM:266600]. CD is a form of remitting inflammatory bowel disease (IBD). CD may involve any part of the gastrointestinal tract, but most frequently the terminal ileum and colon. Bowel inflammation is transmural and discontinuous. Crohn disease is commonly classified as autoimmune disease.	NONE
1zb1_A_cavity_1	4	2.971	0.7428	3	0	1	0	0	0	Vacuolar-sorting protein BRO1	NONE	P48582	NONE	NONE	NONE
2k2q_A_cavity_2	6	2.971	0.4952	5	1	0	0	0	0	Tyrocidine synthetase 3	NONE	O30409	NONE	NONE	NONE
1t90_D_cavity_1	6	2.971	0.4952	3	1	0	0	2	0	Methylmalonate semialdehyde dehydrogenase [acylating]	NONE	P42412	NONE	NONE	NONE
2qkd_A_cavity_7	6	2.971	0.4952	4	2	0	0	0	0	Zinc finger protein ZPR1	NONE	Q62384	NONE	NONE	NONE
1ems_B_cavity_3	6	2.971	0.4952	4	0	2	0	0	0	Nitrilase and fragile histidine triad fusion protein NitFhit [Includes: Bis(5-adenosyl)-triphosphatase	NONE	O76463	Involved in hydrolase activity, acting on carbon-nitrogen (but not peptide) bonds	NONE	NONE
1nkt_A_cavity_4	6	2.97	0.4951	2	2	2	0	0	0	Protein translocase subunit secA 1	NONE	P0A5Y8	Involved in nucleic acid binding	NONE	NONE
2raw_B_cavity_1	5	2.969	0.5939	4	0	1	0	0	0	Baculoviral IAP repeat-containing protein 5	CELL CYCLE	BIRC5_HUMAN	May play a role in neoplasia. May counteract a default induction of apoptosis in G2/M phase. Interacts with tubulin. Inhibitor of caspase-3 and caspase-7. Component of the chromosomal passenger complex (CPC), a complex that acts as a key regulator of mito	NONE	Psoriasis;Alzheimers disease;Glioma;Cancer;Rheumatoid arthritis;Liver tumor;HIV infection;Head and neck tumor;Cervical dysplasia;Solid tumor
1civ_A_cavity_3	5	2.969	0.5938	2	2	1	0	0	0	Malate dehydrogenase [NADP], chloroplast	NONE	P46489	Involved in oxidoreductase activity	NONE	NONE
2k3r_A_cavity_1	6	2.969	0.4948	4	1	1	0	0	0	Ribonuclease P protein component 4	NONE	Q8U0H6	NONE	NONE	NONE
3fnr_A_cavity_5	6	2.969	0.4948	3	1	2	0	0	0	Arginyl-tRNA synthetase	NONE	Q9PNC0	NONE	NONE	NONE
1lqs_L_cavity_2	6	2.968	0.4946	5	0	1	0	0	0	Interleukin-10 receptor alpha chain	IMMUNE SYSTEM	I10R1_HUMAN	Receptor for IL10; binds IL10 with a high affinity.	NONE	NONE
2q2e_B_cavity_7	6	2.967	0.4944	1	1	3	1	0	0	Type II DNA topoisomerase VI subunit A	NONE	Q8PUB7	NONE	NONE	NONE
1bev_1_cavity_1	6	2.967	0.4944	4	1	1	0	0	0	Genome polyprotein	NONE	P12915	NONE	NONE	NONE
1imh_D_cavity_1	6	2.967	0.4944	4	1	1	0	0	0	Nuclear factor of activated T-cells 5	TRANSCRIPTION/DNA	NFAT5_HUMAN	Plays a role in the inducible expression of genes. Regulates hypertonicity-induced cellular accumulation of osmolytes.	NONE	NONE
3epm_B_cavity_1	6	2.966	0.4944	4	1	1	0	0	0	Thiamine biosynthesis protein thiC	NONE	Q9A6Q5	NONE	NONE	NONE
1gmz_A_cavity_1	6	2.966	0.4943	3	0	2	1	0	0	Phospholipase A2-3	NONE	P58464	NONE	NONE	NONE
2au3_A_cavity_3	6	2.965	0.4941	3	1	1	0	1	0	DNA primase	NONE	O67465	NONE	NONE	NONE
2p0r_B_cavity_2	5	2.963	0.5927	3	1	0	1	0	0	Calpain-9	HYDROLASE	CAN9_HUMAN	Calcium-regulated non-lysosomal thiol-protease (By similarity).	NONE	NONE
2d9h_A_cavity_2	5	2.963	0.5925	3	1	1	0	0	0	Zinc finger protein 692	NONE	Q9BU19	NONE	NONE	NONE
3bsz_H_cavity_2	6	2.963	0.4939	3	2	1	0	0	0	Transthyretin	NONE	P02766	Involved in steroid binding	NONE	Used in the treatment of prostate cancer. Previously used in the prevention of miscarriage or premature delivery in pregnant women prone to miscarriage or premature delivery.
1s68_A_cavity_1	6	2.963	0.4938	3	2	1	0	0	0	RNA ligase 2	NONE	P32277	Catalyzes intramolecular and intermolecular RNA strand joining (in vitro). May play a role in the repair of nicked RNA molecules.	NONE	NONE
3ccl_M_cavity_1	6	2.962	0.4937	2	2	1	0	1	0	50S ribosomal protein L37e	NONE	P32410	Involved in structural constituent of ribosome	NONE	NONE
1fe8_J_cavity_2	6	2.961	0.4936	3	2	1	0	0	0	von Willebrand factor	IMMUNE SYSTEM	VWF_HUMAN	Important in the maintenance of hemostasis, it promotes adhesion of platelets to the sites of vascular injury by forming a molecular bridge between sub-endothelial collagen matrix and platelet-surface receptor complex GPIb-IX-V. Also acts as a chaperone f	Defects in VWF are associated with various forms of von Willebrand disease (VWD) [MIM:193400, 277480]. VWD is characterized by frequent bleeding (gingival, minor skin quantitative lacerations, menorrhagia, etc.). Type I VWD is associated with a deficiency of VWF; type II by normal to decreased plasma level of VWF; type III by a virtual absence of VWF. There are subtypes (A to H) of type II VWD; f…	Thrombosis
1ifw_A_cavity_1	6	2.961	0.4935	2	3	1	0	0	0	Polyadenylate-binding protein, cytoplasmic and nuclear	NONE	P04147	NONE	NONE	NONE
2dgu_A_cavity_2	5	2.96	0.5921	3	1	0	0	1	0	Heterogeneous nuclear ribonucleoprotein Q	NONE	O60506	NONE	NONE	NONE
1hyu_A_cavity_5	5	2.96	0.592	2	2	1	0	0	0	Alkyl hydroperoxide reductase subunit F	NONE	P19480	Involved in oxidoreductase activity, acting on NADH or NADPH	NONE	NONE
1po9_A_cavity_2	6	2.96	0.4933	1	1	1	1	2	0	Isoaspartyl dipeptidase	NONE	P39377	Nucleotide transport and metabolism	NONE	NONE
1b7y_B_cavity_5	6	2.96	0.4933	2	1	2	1	0	0	Phenylalanyl-tRNA synthetase alpha chain	NONE	P27001	NONE	NONE	NONE
1qlo_A_cavity_1	6	2.959	0.4931	2	1	2	1	0	0	ICP47 protein	NONE	P03170	NONE	NONE	NONE
2zxh_B_cavity_6	6	2.959	0.4931	3	2	1	0	0	0	tRNA uridine 5-carboxymethylaminomethyl modification enzyme mnmG	NONE	O66962	NONE	NONE	NONE
2h8r_A_cavity_3	6	2.958	0.4931	1	3	2	0	0	0	Hepatocyte nuclear factor 1-beta	TRANSCRIPTION ACTIVATOR/DNA	HNF1B_HUMAN	Transcription factor, probably binds to the inverted palindrome 5-GTTAATNATTAAC-3.	Defects in HNF1B are the cause of maturity-onset diabetes of the young type 5 (MODY5) [MIM:604284]. MODY [MIM:606391] is a form of diabetes mellitus characterized by an autosomal dominant mode of inheritance, age of onset of 25 years or younger and a primary defect in insulin secretion.;Defects in HNF1B are the cause of renal cysts and diabetes syndrome (RCAD) [MIM:137920]; also called maturity-o…	NONE
3cj9_A_cavity_5	4	2.956	0.739	2	1	0	1	0	0	Ectonucleoside triphosphate diphosphohydrolase 2	NONE	O35795	NONE	NONE	NONE
2qxx_A_cavity_2	6	2.956	0.4927	4	1	1	0	0	0	Deoxycytidine triphosphate deaminase	NONE	O07247	NONE	NONE	NONE
1p22_B_cavity_1	6	2.956	0.4927	2	2	1	1	0	0	Catenin beta-1	SIGNALING PROTEIN	CTNB1_HUMAN	Involved in the regulation of cell adhesion and in signal transduction through the Wnt pathway.	Activating mutations in CTNNB1 have oncogenic activity resulting in tumor development. Somatic mutations are found in various tumor types, including colon cancers, ovarian and prostate carcinomas, hepatoblastoma (HB), hepatocellular carcinoma (HCC). HBs are malignant embryonal tumors mainly affecting young children in the first three years of life.;Defects in CTNNB1 are a cause of pilomatrixoma (…	Chronic lymphocytic leukemia;Colon tumor;Cancer;Prostate tumor;Hematological disease;Multiple myeloma
1s99_B_cavity_1	6	2.955	0.4926	4	0	2	0	0	0	Putative HMP/thiamine-binding protein ykoF	NONE	O34911	NONE	NONE	NONE
2vr2_A_cavity_2	6	2.955	0.4925	3	2	1	0	0	0	Dihydropyrimidinase	NONE	Q14117	NONE	NONE	NONE
3bit_A_cavity_2	6	2.954	0.4924	3	3	0	0	0	0	FACT complex subunit SPT16	NONE	P32558	NONE	NONE	NONE
1j0j_B_cavity_2	6	2.954	0.4924	2	1	3	0	0	0	Neopullulanase	NONE	P38940	Involved in catalytic activity	NONE	NONE
3h2z_A_cavity_1	6	2.953	0.4922	4	0	1	1	0	0	Mannitol-1-phosphate 5-dehydrogenase	NONE	Q83PQ0	NONE	NONE	NONE
1e1h_D_cavity_2	5	2.952	0.5904	2	2	1	0	0	0	Botulinum neurotoxin type A	NONE	Q45894	NONE	NONE	NONE
1i9r_M_cavity_1	5	2.952	0.5904	2	1	2	0	0	0	CD40 ligand	NONE	P29965	Involved in tumor necrosis factor receptor binding	NONE	For management as an adjunct to diet to reduce elevated total-C, LDL-C, apo B, and TG levels in patients with primary hypercholesterolemia and mixed dyslipidemia.
1bq4_C_cavity_1	6	2.952	0.492	3	1	1	1	0	0	Phosphoglycerate mutase 1	NONE	P00950	Carbohydrate transport and metabolism	NONE	NONE
2ys5_A_cavity_2	6	2.952	0.492	4	1	1	0	0	0	ALK tyrosine kinase receptor	SIGNALING PROTEIN	ALK_HUMAN	Orphan receptor with a tyrosine-protein kinase activity. Appears to play an important role in the normal development and function of the nervous system. Phosphorylates almost exclusively at the first tyrosine of the Y-x-x-x-Y-Y motif.	A chromosomal aberration involving ALK is found in a form of non-Hodgkin lymphoma. Translocation t(2;5)(p23;q35) with NPM1. The resulting chimeric NPM1-ALK protein homodimerize and the kinase becomes constitutively activated. The constitutively active fusion proteins are responsible for 5-10% of non-Hodgkin lymphomas.;A chromosomal aberration involving ALK is associated with inflammatory myofibro…	Anaplastic large cell lymphoma
1t6p_G_cavity_5	6	2.952	0.492	4	1	1	0	0	0	Phenylalanine ammonia-lyase	NONE	P11544	Amino acid transport and metabolism	NONE	NONE
1q8k_A_cavity_3	6	2.951	0.4919	2	1	2	1	0	0	Eukaryotic translation initiation factor 2 subunit 1	TRANSLATION	IF2A_HUMAN	Functions in the early steps of protein synthesis by forming a ternary complex with GTP and initiator tRNA. This complex binds to a 40S ribosomal subunit, followed by mRNA binding to form a 43S preinitiation complex. Junction of the 60S ribosomal subunit	NONE	NONE
1fcd_B_cavity_2	6	2.951	0.4919	4	1	1	0	0	0	Sulfide dehydrogenase [flavocytochrome c] flavoprotein chain	NONE	Q06530	NONE	NONE	NONE
1egw_D_cavity_2	6	2.951	0.4918	4	2	0	0	0	0	Myocyte-specific enhancer factor 2A	NONE	Q02078	NONE	NONE	NONE
1sc7_A_cavity_7	4	2.95	0.7375	1	3	0	0	0	0	DNA topoisomerase 1	ISOMERASE/DNA	TOP1_HUMAN	The reaction catalyzed by topoisomerases leads to the conversion of one topological isomer of DNA to another.	A chromosomal aberration involving TOP1 is found in a form of therapy-related myelodysplastic syndrome. Translocation t(11;20)(p15;q11) with NUP98.	Bone tumor;Melanoma;Chronic myelocytic leukemia;Lymphoma;Breast tumor;Uterus tumor;Head and neck tumor;Brain tumor;Neoplasm;Ovary tumor;Prostate tumor;Pancreas tumor;Myeloproliferative disorder;HIV infection;Renal tumor;Solid tumor;Psoriasis;Bladder tumor;Esophageal disease;Small-cell lung cancer;Glioma;Cancer;Non-small-cell lung cancer;Colon tumor;Fungal infection;Lung tumor;Colorectal tumor;Ute…
1wfz_A_cavity_1	5	2.95	0.5901	1	0	3	1	0	0	Iron-sulfur cluster assembly enzyme ISCU, mitochondrial	NONE	Q9D7P6	NONE	NONE	NONE
1l1o_C_cavity_3	4	2.949	0.7371	1	2	0	1	0	0	Replication protein A 14 kDa subunit	NONE	P35244	NONE	NONE	NONE
1zxn_B_cavity_3	6	2.949	0.4915	3	2	1	0	0	0	DNA topoisomerase 2-alpha	ISOMERASE	TOP2A_HUMAN	Control of topological states of DNA by transient breakage and subsequent rejoining of DNA strands. Topoisomerase II makes double-strand breaks.	NONE	NONE
1m41_A_cavity_2	6	2.949	0.4915	3	2	1	0	0	0	Alkanesulfonate monooxygenase	NONE	P80645	NONE	NONE	NONE
1qgk_A_cavity_9	4	2.948	0.737	2	0	1	1	0	0	Importin subunit beta-1	NONE	Q14974	NONE	NONE	NONE
2b6e_H_cavity_1	4	2.948	0.737	3	1	0	0	0	0	Putative esterase HI1161	NONE	P45083	NONE	NONE	NONE
1kkr_A_cavity_1	6	2.948	0.4914	1	1	2	0	2	0	3-methylaspartate ammonia-lyase	NONE	O66145	Amino acid transport and metabolism	NONE	NONE
2kbq_A_cavity_1	6	2.948	0.4914	3	1	2	0	0	0	Harmonin	NONE	Q9Y6N9	NONE	NONE	NONE
1m7e_A_cavity_1	5	2.947	0.5893	2	1	1	0	1	0	Disabled homolog 2	NONE	P98078	NONE	NONE	NONE
2ph7_B_cavity_1	6	2.946	0.491	2	0	2	2	0	0	Uncharacterized protein AF_2093	NONE	O28187	NONE	NONE	NONE

## Sheet: swisstargetprediction
Target	Common name	Uniprot ID	ChEMBL ID	Target Class	Probability*
Thrombin and coagulation factor X	F10	P00742	CHEMBL244	Protease	0
Carbonic anhydrase II	CA2	P00918	CHEMBL205	Lyase	0
Thrombin	F2	P00734	CHEMBL204	Protease	0
Integrin alpha-V/beta-3	ITGAV ITGB3	P06756 P05106	CHEMBL1907598	Membrane receptor	0
Protein kinase C gamma	PRKCG	P05129	CHEMBL2938	Kinase	0
Protein kinase C delta	PRKCD	Q05655	CHEMBL2996	Kinase	0
Protein kinase C alpha	PRKCA	P17252	CHEMBL299	Kinase	0
Protein kinase C beta	PRKCB	P05771	CHEMBL3045	Kinase	0
Protein kinase C (PKC)	PRKCZ	Q05513	CHEMBL3438	Kinase	0
Protein kinase C epsilon	PRKCE	Q02156	CHEMBL3582	Kinase	0
Protein kinase C eta	PRKCH	P24723	CHEMBL3616	Kinase	0
Integrin alpha-V/beta-6	ITGAV ITGB6	P06756 P18564	CHEMBL2111416	Membrane receptor	0
cAMP-dependent protein kinase alpha-catalytic subunit	PRKACA	P17612	CHEMBL4101	Kinase	0
Coagulation factor VII	F7	P08709	CHEMBL3991	Protease	0
Squalene monooxygenase (by homology)	SQLE	Q14534	CHEMBL3592	Enzyme	0
Serine/threonine-protein kinase AKT	AKT1	P31749	CHEMBL4282	Kinase	0
Sodium/glucose cotransporter 2	SLC5A2	P31639	CHEMBL3884	Electrochemical transporter	0
Quinone reductase 1	NQO1	P15559	CHEMBL3623	Enzyme	0
Quinone reductase 2	NQO2	P16083	CHEMBL3959	Enzyme	0
Egl nine homolog 1	EGLN1	Q9GZT9	CHEMBL5697	Oxidoreductase	0
Metastin receptor	KISS1R	Q969F8	CHEMBL5413	Family A G protein-coupled receptor	0
Adrenergic receptor alpha-2	ADRA2C	P18825	CHEMBL1916	Family A G protein-coupled receptor	0
Coagulation factor IX	F9	P00740	CHEMBL2016	Protease	0
Tumour suppressor p53/oncoprotein Mdm2	TP53	P04637	CHEMBL4096	Transcription factor	0
Inhibitor of nuclear factor kappa B kinase beta subunit	IKBKB	O14920	CHEMBL1991	Kinase	0
Integrin alpha-IIb/beta-3	ITGA2B ITGB3	P08514 P05106	CHEMBL2093869	Membrane receptor	0
Integrin alpha-5/beta-1	ITGB1 ITGA5	P05556 P08648	CHEMBL2095226	Membrane receptor	0
Beta-secretase 1	BACE1	P56817	CHEMBL4822	Protease	0
Induced myeloid leukemia cell differentiation protein Mcl-1	MCL1	Q07820	CHEMBL4361	Other cytosolic protein	0
Apoptosis regulator Bcl-2	BCL2	P10415	CHEMBL4860	Other ion channel	0
Bcl2-antagonist of cell death (BAD)	BAD	Q92934	CHEMBL3817	Other cytosolic protein	0
DNA topoisomerase I	TOP1	P11387	CHEMBL1781	Isomerase	0
Cyclooxygenase-2	PTGS2	P35354	CHEMBL230	Oxidoreductase	0
Transitional endoplasmic reticulum ATPase	VCP	P55072	CHEMBL1075145	Primary active transporter	0
Troponin, cardiac muscle	TNNC1 TNNT2 TNNI3	P63316 P45379 P19429	CHEMBL2095202	Unclassified protein	0
Carbonic anhydrase VI	CA6	P23280	CHEMBL3025	Lyase	0
PI3-kinase p110-alpha subunit	PIK3CA	P42336	CHEMBL4005	Enzyme	0
Matrix metalloproteinase 9	MMP9	P14780	CHEMBL321	Protease	0
Urokinase-type plasminogen activator	PLAU	P00749	CHEMBL3286	Protease	0
Matrix metalloproteinase 2	MMP2	P08253	CHEMBL333	Protease	0
Prostaglandin E synthase	PTGES	O14684	CHEMBL5658	Enzyme	0
Aldehyde dehydrogenase	ALDH2	P05091	CHEMBL1935	Oxidoreductase	0
Interleukin-2	IL2	P60568	CHEMBL5880	Secreted protein	0
Dual specificity protein phosphatase 3	DUSP3	P51452	CHEMBL2635	Phosphatase	0
Calmodulin	CALM1	P62158	CHEMBL6093	Unclassified protein	0
Peroxisome proliferator-activated receptor gamma	PPARG	P37231	CHEMBL235	Nuclear receptor	0
TNF-alpha	TNF	P01375	CHEMBL1825	Secreted protein	0
Leukotriene B4 receptor 1	LTB4R	Q15722	CHEMBL3911	Family A G protein-coupled receptor	0
Arachidonate 12-lipoxygenase	ALOX12	P18054	CHEMBL3687	Enzyme	0
Thromboxane-A synthase	TBXAS1	P24557	CHEMBL1835	Cytochrome P450	0
Monoamine oxidase A	MAOA	P21397	CHEMBL1951	Oxidoreductase	0
Epidermal growth factor receptor erbB1	EGFR	P00533	CHEMBL203	Kinase	0
Maltase-glucoamylase	MGAM	O43451	CHEMBL2074	Hydrolase	0
Serotonin 2a (5-HT2a) receptor	HTR2A	P28223	CHEMBL224	Family A G protein-coupled receptor	0
Serotonin 2c (5-HT2c) receptor	HTR2C	P28335	CHEMBL225	Family A G protein-coupled receptor	0
Adenosine A2a receptor	ADORA2A	P29274	CHEMBL251	Family A G protein-coupled receptor	0
Estradiol 17-beta-dehydrogenase 1	HSD17B1	P14061	CHEMBL3181	Enzyme	0
Estrogen-related receptor alpha	ESRRA	P11474	CHEMBL3429	Nuclear receptor	0
Estrogen-related receptor beta	ESRRB	O95718	CHEMBL3751	Nuclear receptor	0
ATP-binding cassette sub-family G member 2	ABCG2	Q9UNQ0	CHEMBL5393	Primary active transporter	0
Adenosine A1 receptor (by homology)	ADORA1	P30542	CHEMBL226	Family A G protein-coupled receptor	0
Macrophage migration inhibitory factor	MIF	P14174	CHEMBL2085	Enzyme	0
Tyrosinase (by homology)	TYR	P14679	CHEMBL1973	Oxidoreductase	0
6-phosphofructo-2-kinase/fructose-2,6-bisphosphatase 3	PFKFB3	Q16875	CHEMBL2331053	Enzyme	0
Estradiol 17-beta-dehydrogenase 2	HSD17B2	P37059	CHEMBL2789	Enzyme	0
Carbonyl reductase [NADPH] 1	CBR1	P16152	CHEMBL5586	Enzyme	0
Cyclooxygenase-1	PTGS1	P23219	CHEMBL221	Oxidoreductase	0
Norepinephrine transporter	SLC6A2	P23975	CHEMBL222	Electrochemical transporter	0
Estrogen receptor alpha	ESR1	P03372	CHEMBL206	Nuclear receptor	0
P-selectin	SELP	P16109	CHEMBL5378	Adhesion	0
Receptor-type tyrosine-protein phosphatase S	PTPRS	Q13332	CHEMBL2396508	Phosphatase	0
P-glycoprotein 1	ABCB1	P08183	CHEMBL4302	Primary active transporter	0
Arachidonate 15-lipoxygenase	ALOX15	P16050	CHEMBL2903	Enzyme	0
Arachidonate 5-lipoxygenase	ALOX5	P09917	CHEMBL215	Oxidoreductase	0
Leukocyte adhesion molecule-1	SELL	P14151	CHEMBL3161	Adhesion	0
Monoamine oxidase B	MAOB	P27338	CHEMBL2039	Oxidoreductase	0
Estrogen receptor beta	ESR2	Q92731	CHEMBL242	Nuclear receptor	0
CDK9/cyclin T1	CDK9 CCNT1	P50750 O60563	CHEMBL2111389	Other cytosolic protein	0
CDK2/Cyclin A	CCNA2 CDK2	P20248 P24941	CHEMBL3038469	Kinase	0
Phosphodiesterase 4D	PDE4D	Q08499	CHEMBL288	Phosphodiesterase	0
Mu opioid receptor	OPRM1	P35372	CHEMBL233	Family A G protein-coupled receptor	0
Kappa Opioid receptor	OPRK1	P41145	CHEMBL237	Family A G protein-coupled receptor	0
Carbonic anhydrase IV	CA4	P22748	CHEMBL3729	Lyase	0
Hypoxia-inducible factor 1 alpha	HIF1A	Q16665	CHEMBL4261	Transcription factor	0
Serum paraoxonase/arylesterase 1	PON1	P27169	CHEMBL3167	Enzyme	0
Protein-tyrosine phosphatase 1B	PTPN1	P18031	CHEMBL335	Phosphatase	0
Acetylcholinesterase	ACHE	P22303	CHEMBL220	Hydrolase	0
Cytochrome P450 19A1	CYP19A1	P11511	CHEMBL1978	Cytochrome P450	0
Xanthine dehydrogenase	XDH	P47989	CHEMBL1929	Oxidoreductase	0
NADPH oxidase 4	NOX4	Q9NPH5	CHEMBL1250375	Enzyme	0
Cyclin-dependent kinase 5/CDK5 activator 1	CDK5R1 CDK5	Q15078 Q00535	CHEMBL1907600	Kinase	0
Equilibrative nucleoside transporter 1	SLC29A1	Q99808	CHEMBL1997	Electrochemical transporter	0.106166
Aldose reductase (by homology)	AKR1B1	P15121	CHEMBL1900	Enzyme	0.114495
Carbonic anhydrase VII	CA7	P43166	CHEMBL2326	Lyase	1
Carbonic anhydrase XII	CA12	O43570	CHEMBL3242	Lyase	1

## Sheet: TCMSP
Drug	MolId	MolName	Symbol
puerarin	MOL012297	puerarin	ESR1
puerarin	MOL012297	puerarin	AR
puerarin	MOL012297	puerarin	PTGS2
puerarin	MOL012297	puerarin	CA2
puerarin	MOL012297	puerarin	GSK3B
puerarin	MOL012297	puerarin	CAMSAP2
puerarin	MOL012297	puerarin	RELA
puerarin	MOL012297	puerarin	STAT3
puerarin	MOL012297	puerarin	AKT1
puerarin	MOL012297	puerarin	VEGFA
puerarin	MOL012297	puerarin	BCL2
puerarin	MOL012297	puerarin	FOS
puerarin	MOL012297	puerarin	BAX
puerarin	MOL012297	puerarin	CASP9
puerarin	MOL012297	puerarin	MMP2
puerarin	MOL012297	puerarin	MMP9
puerarin	MOL012297	puerarin	TNFAIP6
puerarin	MOL012297	puerarin	JUN
puerarin	MOL012297	puerarin	NOS2
puerarin	MOL012297	puerarin	CASP3
puerarin	MOL012297	puerarin	NFKBIA
puerarin	MOL012297	puerarin	CASP8
puerarin	MOL012297	puerarin	BAD
puerarin	MOL012297	puerarin	SOD1
puerarin	MOL012297	puerarin	PRKCA
puerarin	MOL012297	puerarin	TIMP2
puerarin	MOL012297	puerarin	HIF1A
puerarin	MOL012297	puerarin	FAS
puerarin	MOL012297	puerarin	PPARG
puerarin	MOL012297	puerarin	VCAM1
puerarin	MOL012297	puerarin	MAPK9
puerarin	MOL012297	puerarin	BIRC5
puerarin	MOL012297	puerarin	NOS3
puerarin	MOL012297	puerarin	PLAT
puerarin	MOL012297	puerarin	CYP19A1
puerarin	MOL012297	puerarin	GSTP1
puerarin	MOL012297	puerarin	CHEK2
puerarin	MOL012297	puerarin	SELPLG
puerarin	MOL012297	puerarin	AGTR1
puerarin	MOL012297	puerarin	AKR1B1
puerarin	MOL012297	puerarin	IFNB1
puerarin	MOL012297	puerarin	PDGFA
puerarin	MOL012297	puerarin	ACE2
puerarin	MOL012297	puerarin	GPT
puerarin	MOL012297	puerarin	PGP
puerarin	MOL012297	puerarin	JAK3
puerarin	MOL012297	puerarin	CDKN1B
puerarin	MOL012297	puerarin	CDKN2AIP
puerarin	MOL012297	puerarin	IFNA1
puerarin	MOL012297	puerarin	ITGB5
puerarin	MOL012297	puerarin	LEPR
puerarin	MOL012297	puerarin	PLIN2
puerarin	MOL012297	puerarin	F2R
